# Supplementary material for: Ru(O2CCF3)2(PPh3)2 and ruthenium phosphine complexes bearing fluoroacetate ligands: synthesis, characterization and catalytic activity
Source: Royal Society of Chemistry journal article supplement (doi:10.1039/c9dt00334g), 2019-01-01
Supplement: c9dt00334g1.pdf [file c9dt00334g1.pdf]

**Ru(O<sub>2</sub>CCF<sub>3</sub>)<sub>2</sub>(PPh<sub>3</sub>)<sub>2</sub> and ruthenium phosphine complexes bearing fluoroacetate ligands: synthesis, characterization and catalytic activity**

Daniela A. Hey<sup>a,#</sup>, Pauline J. Fischer<sup>a,#</sup>, Walter Baratta<sup>b,\*</sup>, Fritz E. Kühn<sup>a,\*</sup>

<sup>#</sup>D.A.H. and P.J.F. contributed equally to this work.

<sup>a</sup> *Molecular Catalysis, Catalysis Research Center and Department of Chemistry, Technische Universität München, Lichtenbergstr. 4, 85747 Garching bei München, Germany*

<sup>b</sup> *Dipartimento di Scienze AgroAlimentari, Ambientali e Animali (DI4A), Università di Udine, Via Cotonificio 108, I-33100 Udine, Italy*

**Supporting Information**

## Table of contents

|                                                             |    |
|-------------------------------------------------------------|----|
| <b>1. Crystallographic data</b> .....                       | 1  |
| <b>1.1 Crystallographic data for complex 1a</b> .....       | 1  |
| <b>1.2 Crystallographic data for complex 1b</b> .....       | 3  |
| <b>1.3 Crystallographic data for complex 2</b> .....        | 5  |
| <b>1.4 Crystallographic data for complex 3</b> .....        | 7  |
| <b>1.5 Crystallographic data for complex 4</b> .....        | 9  |
| <b>1.6 Crystallographic data for complex 6</b> .....        | 11 |
| <b>1.7 Crystallographic data for complex 7</b> .....        | 13 |
| <b>1.8 Crystallographic data for complex 8</b> .....        | 15 |
| <b>2. NMR spectra</b> .....                                 | 17 |
| <b>2.1 NMR spectra of complex 1</b> .....                   | 17 |
| <b>2.2 NMR spectra of complex 2</b> .....                   | 19 |
| <b>2.3 NMR spectra of complex 3</b> .....                   | 22 |
| <b>2.4 NMR spectra of complex 4</b> .....                   | 25 |
| <b>2.5 NMR spectra of complex 7</b> .....                   | 28 |
| <b>2.6 NMR spectra of complex 8</b> .....                   | 30 |
| <b>3. Catalytic transfer hydrogenation of ketones</b> ..... | 32 |
| <b>3.1 Transfer hydrogenation of acetophenone</b> .....     | 32 |
| <b>3.2 Transfer hydrogenation of benzophenone</b> .....     | 34 |
| <b>3.3 Transfer hydrogenation of cyclohexanone</b> .....    | 35 |

## 1. Crystallographic data

### 1.1 Crystallographic data for complex 1a.

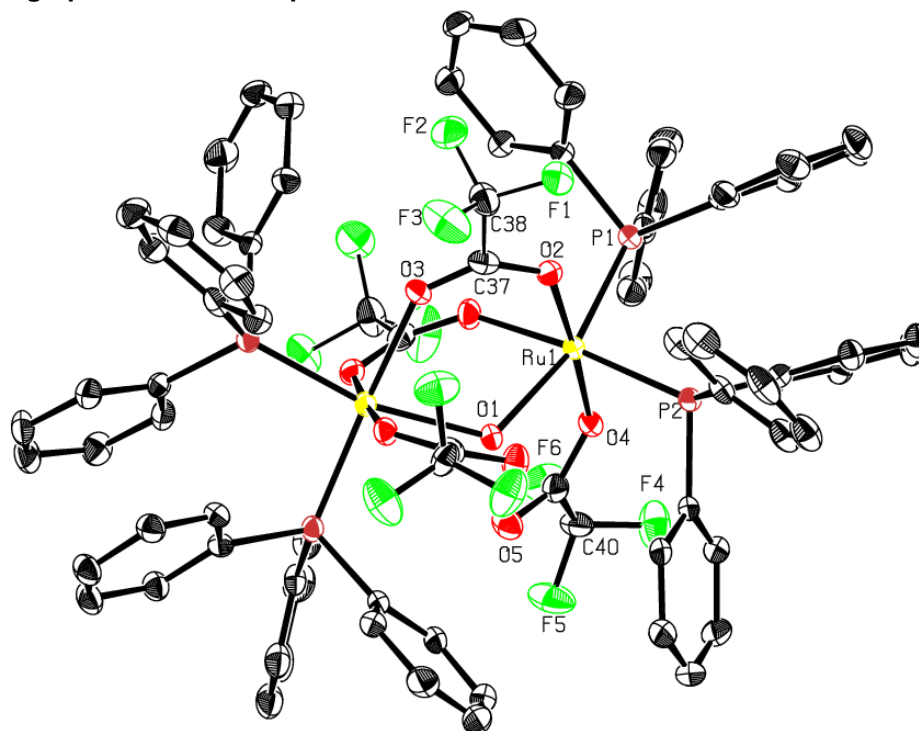

Figure S1.1. ORTEP style drawing of **1a** with ellipsoids at 50% probability level. All hydrogen atoms were omitted for clarity, hydrogens on O1 could be located in the difference Fourier maps.

A clear yellow-brown fragment-like specimen of  $C_{40}H_{31}F_6O_{4.50}P_2Ru$ , approximate dimensions 0.105 mm x 0.211 mm x 0.345 mm, was used for the X-ray crystallographic analysis. The X-ray intensity data were measured on a Bruker D8 Venture Duo IMS system equipped with a Helios optic monochromator and a Mo IMS microsource ( $\lambda = 0.71073 \text{ \AA}$ ).

A total of 4799 frames were collected. The total exposure time was 12.88 hours. The frames were integrated with the Bruker SAINT software package using a narrow-frame algorithm. The integration of the data using an orthorhombic unit cell yielded a total of 281355 reflections to a maximum  $\theta$  angle of  $25.02^\circ$  ( $0.84 \text{ \AA}$  resolution), of which 7083 were independent (average redundancy 39.723, completeness = 99.9%,  $R_{int} = 6.86\%$ ,  $R_{sig} = 1.67\%$ ) and 6223 (87.86%) were greater than  $2\sigma(F^2)$ . The final cell constants of  $a = 11.9960(14) \text{ \AA}$ ,  $b = 30.198(4) \text{ \AA}$ ,  $c = 44.214(5) \text{ \AA}$ , volume =  $16017.(3) \text{ \AA}^3$ , are based upon the refinement of the XYZ-centroids of 9475 reflections above  $20 \sigma(I)$  with  $4.566^\circ < 2\theta < 51.34^\circ$ . Data were corrected for absorption effects using the Multi-Scan method (SADABS). The ratio of minimum to maximum apparent transmission was 0.913. The calculated minimum and maximum transmission coefficients (based on crystal size) are 0.8360 and 0.9460.

The final anisotropic full-matrix least-squares refinement on  $F^2$  with 523 variables converged at  $R1 = 6.74\%$ , for the observed data and  $wR2 = 17.08\%$  for all data. The goodness-of-fit was 1.068. The largest peak in the final difference electron density synthesis was  $6.577 e^{-}/\text{\AA}^3$  and the largest hole was  $-1.270 e^{-}/\text{\AA}^3$  with an RMS deviation of  $0.138 e^{-}/\text{\AA}^3$ . On the basis of the final model, the calculated density was  $1.428 \text{ g/cm}^3$  and  $F(000)$ , 6960 e<sup>-</sup>.

Table 1.1.1. Sample and crystal data for **1a**.

|                               |                                                                                    |         |
|-------------------------------|------------------------------------------------------------------------------------|---------|
| <b>CCDC number</b>            | 1892673                                                                            |         |
| <b>Chemical formula</b>       | C <sub>40</sub> H <sub>31</sub> F <sub>6</sub> O <sub>4.50</sub> P <sub>2</sub> Ru |         |
| <b>Formula weight</b>         | 860.66                                                                             |         |
| <b>Temperature</b>            | 100(2) K                                                                           |         |
| <b>Wavelength</b>             | 0.71073 Å                                                                          |         |
| <b>Crystal size</b>           | 0.105 x 0.211 x 0.345 mm                                                           |         |
| <b>Crystal habit</b>          | clear yellow-brown fragment                                                        |         |
| <b>Crystal system</b>         | orthorhombic                                                                       |         |
| <b>Space group</b>            | I b c a                                                                            |         |
| <b>Unit cell dimensions</b>   | a = 11.9960(14) Å                                                                  | α = 90° |
|                               | b = 30.198(4) Å                                                                    | β = 90° |
|                               | c = 44.214(5) Å                                                                    | γ = 90° |
| <b>Volume</b>                 | 16017.(3) Å <sup>3</sup>                                                           |         |
| <b>Z</b>                      | 16                                                                                 |         |
| <b>Density (calculated)</b>   | 1.428 g/cm <sup>3</sup>                                                            |         |
| <b>Absorption coefficient</b> | 0.539 mm <sup>-1</sup>                                                             |         |
| <b>F(000)</b>                 | 6960                                                                               |         |

Table 1.1.2. Data collection and structure refinement for **1a**.

|                                            |                                                                                                                                                                         |
|--------------------------------------------|-------------------------------------------------------------------------------------------------------------------------------------------------------------------------|
| <b>Diffractometer</b>                      | Bruker D8 Venture Duo IMS                                                                                                                                               |
| <b>Radiation source</b>                    | IMS microsource, Mo                                                                                                                                                     |
| <b>Theta range for data collection</b>     | 2.05 to 25.02°                                                                                                                                                          |
| <b>Index ranges</b>                        | -14 ≤ h ≤ 14, -35 ≤ k ≤ 35, -52 ≤ l ≤ 52                                                                                                                                |
| <b>Reflections collected</b>               | 281355                                                                                                                                                                  |
| <b>Independent reflections</b>             | 7083 [R(int) = 0.0686]                                                                                                                                                  |
| <b>Coverage of independent reflections</b> | 99.9%                                                                                                                                                                   |
| <b>Absorption correction</b>               | Multi-Scan                                                                                                                                                              |
| <b>Max. and min. transmission</b>          | 0.9460 and 0.8360                                                                                                                                                       |
| <b>Refinement method</b>                   | Full-matrix least-squares on F <sup>2</sup>                                                                                                                             |
| <b>Refinement program</b>                  | SHELXL-2014/7 (Sheldrick, 2014)                                                                                                                                         |
| <b>Function minimized</b>                  | Σ w(F <sub>o</sub> <sup>2</sup> - F <sub>c</sub> <sup>2</sup> ) <sup>2</sup>                                                                                            |
| <b>Data / restraints / parameters</b>      | 7083 / 128 / 523                                                                                                                                                        |
| <b>Goodness-of-fit on F<sup>2</sup></b>    | 1.068                                                                                                                                                                   |
| <b>Δ/σ<sub>max</sub></b>                   | 0.001                                                                                                                                                                   |
| <b>Final R indices</b>                     | 6223<br>data; R1 = 0.0674, wR2 = 0.1604<br>I > 2σ(I)<br>all data R1 = 0.0765, wR2 = 0.1708                                                                              |
| <b>Weighting scheme</b>                    | w = 1/[σ <sup>2</sup> (F <sub>o</sub> <sup>2</sup> ) + (0.0677P) <sup>2</sup> + 286.9807P]<br>where P = (F <sub>o</sub> <sup>2</sup> + 2F <sub>c</sub> <sup>2</sup> )/3 |
| <b>Largest diff. peak and hole</b>         | 6.577 and -1.270 eÅ <sup>-3</sup>                                                                                                                                       |
| <b>R.M.S. deviation from mean</b>          | 0.138 eÅ <sup>-3</sup>                                                                                                                                                  |



Table 1.2.1. Sample and crystal data for **1b**.

|                               |                                                                                                                |                |
|-------------------------------|----------------------------------------------------------------------------------------------------------------|----------------|
| <b>CCDC number</b>            | 1892671                                                                                                        |                |
| <b>Chemical formula</b>       | C <sub>84</sub> H <sub>60</sub> F <sub>18</sub> O <sub>12</sub> P <sub>4</sub> Ru <sub>2</sub> Tl <sub>2</sub> |                |
| <b>Formula weight</b>         | 2338.10                                                                                                        |                |
| <b>Wavelength</b>             | 0.71073 Å                                                                                                      |                |
| <b>Crystal size</b>           | 0.133 x 0.149 x 0.192 mm                                                                                       |                |
| <b>Crystal habit</b>          | clear yellow-brown fragment                                                                                    |                |
| <b>Crystal system</b>         | monoclinic                                                                                                     |                |
| <b>Space group</b>            | P 1 21/n 1                                                                                                     |                |
| <b>Unit cell dimensions</b>   | a = 10.7843(9) Å                                                                                               | α = 90°        |
|                               | b = 16.6625(13) Å                                                                                              | β = 96.281(3)° |
|                               | c = 24.1130(19) Å                                                                                              | γ = 90°        |
| <b>Volume</b>                 | 4306.9(6) Å <sup>3</sup>                                                                                       |                |
| <b>Z</b>                      | 2                                                                                                              |                |
| <b>Density (calculated)</b>   | 1.803 g/cm <sup>3</sup>                                                                                        |                |
| <b>Absorption coefficient</b> | 4.246 mm <sup>-1</sup>                                                                                         |                |
| <b>F(000)</b>                 | 2264                                                                                                           |                |

Table 1.2.2. Data collection and structure refinement for **1b**.

|                                            |                                                                                                                                                                       |
|--------------------------------------------|-----------------------------------------------------------------------------------------------------------------------------------------------------------------------|
| <b>Diffractometer</b>                      | Bruker D8 Venture                                                                                                                                                     |
| <b>Radiation source</b>                    | TXS rotating anode, Mo                                                                                                                                                |
| <b>Theta range for data collection</b>     | 2.26 to 25.68°                                                                                                                                                        |
| <b>Index ranges</b>                        | -13 ≤ h ≤ 13, -20 ≤ k ≤ 20, -29 ≤ l ≤ 29                                                                                                                              |
| <b>Reflections collected</b>               | 139817                                                                                                                                                                |
| <b>Independent reflections</b>             | 8182 [R(int) = 0.0510]                                                                                                                                                |
| <b>Coverage of independent reflections</b> | 99.9%                                                                                                                                                                 |
| <b>Max. and min. transmission</b>          | 0.7453 and 0.6663                                                                                                                                                     |
| <b>Structure solution technique</b>        | direct methods                                                                                                                                                        |
| <b>Structure solution program</b>          | SHELXT (Sheldrick, 2015)                                                                                                                                              |
| <b>Refinement method</b>                   | Full-matrix least-squares on F <sup>2</sup>                                                                                                                           |
| <b>Refinement program</b>                  | SHELXL2014 (Sheldrick, 2014), SHELXLE (Huebschle, 2011)                                                                                                               |
| <b>Function minimized</b>                  | Σ w(F <sub>o</sub> <sup>2</sup> - F <sub>c</sub> <sup>2</sup> ) <sup>2</sup>                                                                                          |
| <b>Data / restraints / parameters</b>      | 8182 / 66 / 606                                                                                                                                                       |
| <b>Goodness-of-fit on F<sup>2</sup></b>    | 1.059                                                                                                                                                                 |
| <b>Δ/σ<sub>max</sub></b>                   | 0.009                                                                                                                                                                 |
|                                            | 7387                                                                                                                                                                  |
| <b>Final R indices</b>                     | data; R1 = 0.0197, wR2 = 0.0458<br>I > 2σ(I)                                                                                                                          |
|                                            | all<br>data R1 = 0.0240, wR2 = 0.0469                                                                                                                                 |
| <b>Weighting scheme</b>                    | W = 1/[Σ <sup>2</sup> (F <sub>o</sub> <sup>2</sup> ) + (0.0232P) <sup>2</sup> + 4.2704P] where<br>P = (F <sub>o</sub> <sup>2</sup> + 2F <sub>c</sub> <sup>2</sup> )/3 |
| <b>Largest diff. peak and hole</b>         | 1.263 and -0.822 eÅ <sup>-3</sup>                                                                                                                                     |
| <b>R.M.S. deviation from mean</b>          | 0.075 eÅ <sup>-3</sup>                                                                                                                                                |

### 1.3 Crystallographic data for complex 2.

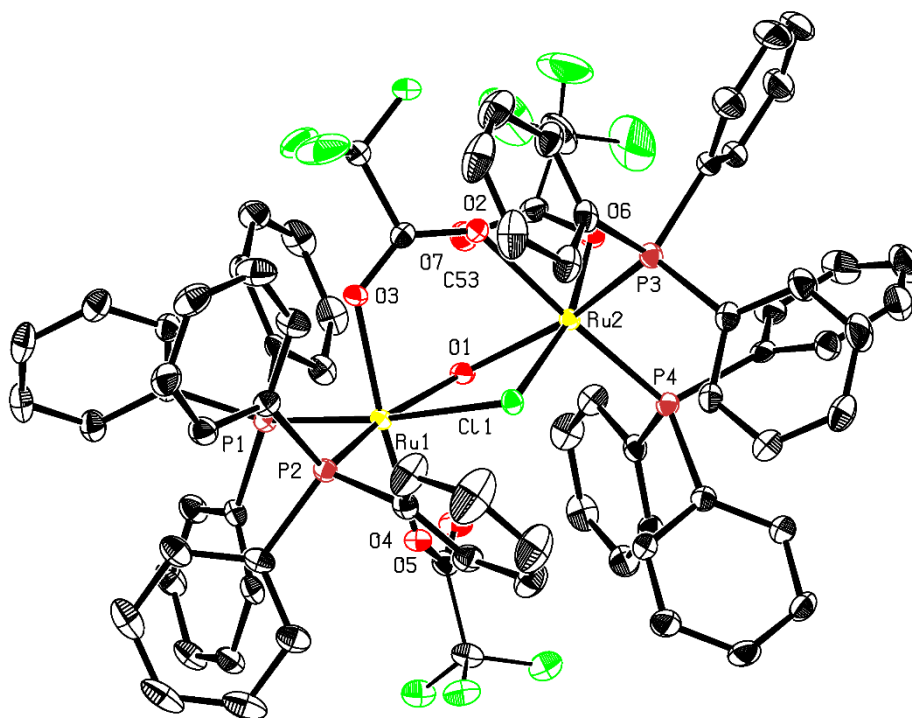

Figure S1.3. ORTEP style drawing of dinuclear complex **2** with ellipsoids at 50% probability level. All hydrogen atoms were omitted for clarity, hydrogens on O1 could be located in the difference Fourier maps.

A clear intense orange fragment-like specimen of  $C_{79}H_{64}Cl_3F_9O_7P_4Ru_2$ , approximate dimensions 0.054 mm x 0.139 mm x 0.287 mm, was used for the X-ray crystallographic analysis. The X-ray intensity data were measured on a Bruker D8 Kappa Apex II system equipped with a Triumph monochromator monochromator and a Mo fine-focus sealed tube ( $\lambda = 0.71073 \text{ \AA}$ ).

A total of 2886 frames were collected. The total exposure time was 8.02 hours. The frames were integrated with the Bruker SAINT software package using a narrow-frame algorithm. The integration of the data using a monoclinic unit cell yielded a total of 77986 reflections to a maximum  $\theta$  angle of  $25.45^\circ$  ( $0.83 \text{ \AA}$  resolution), of which 14180 were independent (average redundancy 5.500, completeness = 98.7%,  $R_{int} = 5.69\%$ ,  $R_{sig} = 4.42\%$ ) and 11518 (81.23%) were greater than  $2\sigma(F^2)$ . The final cell constants of  $a = 13.819(3) \text{ \AA}$ ,  $b = 39.501(10) \text{ \AA}$ ,  $c = 14.479(4) \text{ \AA}$ ,  $\beta = 100.849(14)^\circ$ , volume =  $7762.(3) \text{ \AA}^3$ , are based upon the refinement of the XYZ-centroids of 115 reflections above  $20 \sigma(I)$  with  $11.51^\circ < 2\theta < 46.70^\circ$ . Data were corrected for absorption effects using the Multi-Scan method (SADABS). The ratio of minimum to maximum apparent transmission was 0.929. The calculated minimum and maximum transmission coefficients (based on crystal size) are 0.8360 and 0.9660.

The final anisotropic full-matrix least-squares refinement on  $F^2$  with 1057 variables converged at  $R1 = 3.24\%$ , for the observed data and  $wR2 = 7.30\%$  for all data. The goodness-of-fit was 1.016. The largest peak in the final difference electron density synthesis was  $0.517 \text{ e/\AA}^3$  and the largest hole was  $-0.817 \text{ e/\AA}^3$  with an RMS deviation of  $0.070 \text{ e/\AA}^3$ . On the basis of the final model, the calculated density was  $1.479 \text{ g/cm}^3$  and  $F(000)$ , 3496 e $^-$ .

Table 1.3.1. Sample and crystal data for **2**.

|                               |                                                                                                              |                  |
|-------------------------------|--------------------------------------------------------------------------------------------------------------|------------------|
| <b>CCDC number</b>            | 1892670                                                                                                      |                  |
| <b>Chemical formula</b>       | C <sub>79</sub> H <sub>64</sub> Cl <sub>3</sub> F <sub>9</sub> O <sub>7</sub> P <sub>4</sub> Ru <sub>2</sub> |                  |
| <b>Formula weight</b>         | 1728.67                                                                                                      |                  |
| <b>Temperature</b>            | 100(2) K                                                                                                     |                  |
| <b>Wavelength</b>             | 0.71073 Å                                                                                                    |                  |
| <b>Crystal size</b>           | 0.054 x 0.139 x 0.287 mm                                                                                     |                  |
| <b>Crystal habit</b>          | clear intense orange fragment                                                                                |                  |
| <b>Crystal system</b>         | monoclinic                                                                                                   |                  |
| <b>Space group</b>            | P 1 21/n 1                                                                                                   |                  |
| <b>Unit cell dimensions</b>   | a = 13.819(3) Å                                                                                              | α = 90°          |
|                               | b = 39.501(10) Å                                                                                             | β = 100.849(14)° |
|                               | c = 14.479(4) Å                                                                                              | γ = 90°          |
| <b>Volume</b>                 | 7762.(3) Å <sup>3</sup>                                                                                      |                  |
| <b>Z</b>                      | 4                                                                                                            |                  |
| <b>Density (calculated)</b>   | 1.479 g/cm <sup>3</sup>                                                                                      |                  |
| <b>Absorption coefficient</b> | 0.649 mm <sup>-1</sup>                                                                                       |                  |
| <b>F(000)</b>                 | 3496                                                                                                         |                  |

Table 1.3.2. Data collection and structure refinement for **2**.

|                                            |                                                                                                                                                               |                           |
|--------------------------------------------|---------------------------------------------------------------------------------------------------------------------------------------------------------------|---------------------------|
| <b>Diffractometer</b>                      | Bruker D8 Kappa Apex II                                                                                                                                       |                           |
| <b>Radiation source</b>                    | fine-focus sealed tube, Mo                                                                                                                                    |                           |
| <b>Theta range for data collection</b>     | 1.59 to 25.45°                                                                                                                                                |                           |
| <b>Index ranges</b>                        | -16<=h<=10, -47<=k<=47, -16<=l<=17                                                                                                                            |                           |
| <b>Reflections collected</b>               | 77986                                                                                                                                                         |                           |
| <b>Independent reflections</b>             | 14180 [R(int) = 0.0569]                                                                                                                                       |                           |
| <b>Coverage of independent reflections</b> | 98.7%                                                                                                                                                         |                           |
| <b>Absorption correction</b>               | Multi-Scan                                                                                                                                                    |                           |
| <b>Max. and min. transmission</b>          | 0.9660 and 0.8360                                                                                                                                             |                           |
| <b>Refinement method</b>                   | Full-matrix least-squares on F <sup>2</sup>                                                                                                                   |                           |
| <b>Refinement program</b>                  | SHELXL-2014/7 (Sheldrick, 2014)                                                                                                                               |                           |
| <b>Function minimized</b>                  | Σ w(F <sub>o</sub> <sup>2</sup> - F <sub>c</sub> <sup>2</sup> ) <sup>2</sup>                                                                                  |                           |
| <b>Data / restraints / parameters</b>      | 14180 / 259 / 1057                                                                                                                                            |                           |
| <b>Goodness-of-fit on F<sup>2</sup></b>    | 1.016                                                                                                                                                         |                           |
| <b>Δ/σ<sub>max</sub></b>                   | 0.002                                                                                                                                                         |                           |
| <b>Final R indices</b>                     | 11518                                                                                                                                                         |                           |
|                                            | data;                                                                                                                                                         | R1 = 0.0324, wR2 = 0.0683 |
|                                            | >2σ(I)                                                                                                                                                        |                           |
|                                            | all data                                                                                                                                                      | R1 = 0.0466, wR2 = 0.0730 |
| <b>Weighting scheme</b>                    | w=1/[σ <sup>2</sup> (F <sub>o</sub> <sup>2</sup> )+(0.0276P) <sup>2</sup> +6.4943P]<br>where P=(F <sub>o</sub> <sup>2</sup> +2F <sub>c</sub> <sup>2</sup> )/3 |                           |
| <b>Largest diff. peak and hole</b>         | 0.517 and -0.817 eÅ <sup>-3</sup>                                                                                                                             |                           |
| <b>R.M.S. deviation from mean</b>          | 0.070 eÅ <sup>-3</sup>                                                                                                                                        |                           |



### 1.4 Crystallographic data for complex 3.

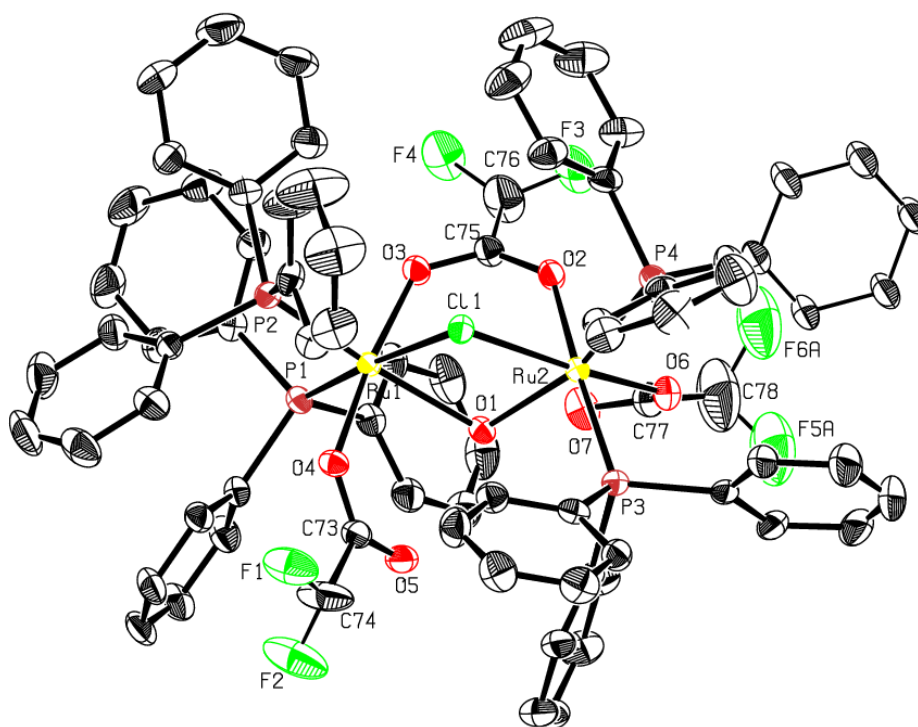

Figure S1.4. ORTEP style drawing of dinuclear complex **3** with ellipsoids at 50% probability level. All hydrogen atoms were omitted for clarity, hydrogens on O1 could be located in the difference Fourier maps.

A specimen of  $C_{79}H_{67}Cl_3F_6O_7P_4Ru_2$ , approximate dimensions 0.088 mm x 0.172 mm x 0.649 mm, was used for the X-ray crystallographic analysis. The X-ray intensity data were measured on a Bruker D8 Venture system equipped with a Helios optic monochromator and a Mo TXS rotating anode ( $\lambda = 0.71073 \text{ \AA}$ ).

A total of 2525 frames were collected. The total exposure time was 3.31 hours. The integration of the data using a monoclinic unit cell yielded a total of 129404 reflections to a maximum  $\theta$  angle of  $25.03^\circ$  ( $0.84 \text{ \AA}$  resolution), of which 13519 were independent (average redundancy 9.572, completeness = 99.9%,  $R_{int} = 12.91\%$ ,  $R_{sig} = 6.41\%$ ) and 10421 (77.08%) were greater than  $2\sigma(F^2)$ . The final cell constants of  $a = 13.639(7) \text{ \AA}$ ,  $b = 39.50(2) \text{ \AA}$ ,  $c = 14.472(8) \text{ \AA}$ ,  $\beta = 100.941(16)^\circ$ , volume =  $7655.(7) \text{ \AA}^3$ , are based upon the refinement of the XYZ-centroids of reflections above  $20 \sigma(I)$ . The calculated minimum and maximum transmission coefficients (based on crystal size) are 0.6780 and 0.9450.

The final anisotropic full-matrix least-squares refinement on  $F^2$  with 1030 variables converged at  $R1 = 4.58\%$ , for the observed data and  $wR2 = 11.01\%$  for all data. The goodness-of-fit was 1.008. The largest peak in the final difference electron density synthesis was  $1.034 \text{ e}/\text{\AA}^3$  and the largest hole was  $-0.630 \text{ e}/\text{\AA}^3$  with an RMS deviation of  $0.089 \text{ e}/\text{\AA}^3$ . On the basis of the final model, the calculated density was  $1.453 \text{ g}/\text{cm}^3$  and  $F(000)$ , 3400 e $^-$ .

Table 1.4.1. Sample and crystal data for **3**.

|                               |                                                                                                              |
|-------------------------------|--------------------------------------------------------------------------------------------------------------|
| <b>CCDC number</b>            | 1892675                                                                                                      |
| <b>Chemical formula</b>       | C <sub>79</sub> H <sub>67</sub> Cl <sub>3</sub> F <sub>6</sub> O <sub>7</sub> P <sub>4</sub> Ru <sub>2</sub> |
| <b>Formula weight</b>         | 1674.69                                                                                                      |
| <b>Temperature</b>            | 100(2) K                                                                                                     |
| <b>Wavelength</b>             | 0.71073 Å                                                                                                    |
| <b>Crystal size</b>           | 0.088 x 0.172 x 0.649 mm                                                                                     |
| <b>Crystal system</b>         | monoclinic                                                                                                   |
| <b>Space group</b>            | P 1 21/n 1                                                                                                   |
| <b>Unit cell dimensions</b>   | a = 13.639(7) Å      α = 90°<br>b = 39.50(2) Å      β = 100.941(16)°<br>c = 14.472(8) Å      γ = 90°         |
| <b>Volume</b>                 | 7655.(7) Å <sup>3</sup>                                                                                      |
| <b>Z</b>                      | 4                                                                                                            |
| <b>Density (calculated)</b>   | 1.453 g/cm <sup>3</sup>                                                                                      |
| <b>Absorption coefficient</b> | 0.650 mm <sup>-1</sup>                                                                                       |
| <b>F(000)</b>                 | 3400                                                                                                         |

Table 1.4.2. Data collection and structure refinement for **3**.

|                                         |                                                                                                                                                                |
|-----------------------------------------|----------------------------------------------------------------------------------------------------------------------------------------------------------------|
| <b>Diffractometer</b>                   | Bruker D8 Venture                                                                                                                                              |
| <b>Radiation source</b>                 | TXS rotating anode, Mo                                                                                                                                         |
| <b>Theta range for data collection</b>  | 2.17 to 25.03°                                                                                                                                                 |
| <b>Index ranges</b>                     | -13 ≤ h ≤ 16, -47 ≤ k ≤ 47, -17 ≤ l ≤ 17                                                                                                                       |
| <b>Reflections collected</b>            | 129404                                                                                                                                                         |
| <b>Independent reflections</b>          | 13519 [R(int) = 0.1291]                                                                                                                                        |
| <b>Max. and min. transmission</b>       | 0.9450 and 0.6780                                                                                                                                              |
| <b>Refinement method</b>                | Full-matrix least-squares on F <sup>2</sup>                                                                                                                    |
| <b>Refinement program</b>               | SHELXL-2016/6 (Sheldrick, 2016)                                                                                                                                |
| <b>Function minimized</b>               | Σ w(F <sub>o</sub> <sup>2</sup> - F <sub>c</sub> <sup>2</sup> ) <sup>2</sup>                                                                                   |
| <b>Data / restraints / parameters</b>   | 13519 / 424 / 1030                                                                                                                                             |
| <b>Goodness-of-fit on F<sup>2</sup></b> | 1.008                                                                                                                                                          |
| <b>Δ/σ<sub>max</sub></b>                | 0.002                                                                                                                                                          |
| <b>Final R indices</b>                  | 10421 data;      R1 = 0.0458, wR2 = 0.1006<br> >2σ(I)<br>all data      R1 = 0.0687, wR2 = 0.1101                                                               |
| <b>Weighting scheme</b>                 | w=1/[σ <sup>2</sup> (F <sub>o</sub> <sup>2</sup> )+(0.0402P) <sup>2</sup> +15.8467P]<br>where P=(F <sub>o</sub> <sup>2</sup> +2F <sub>c</sub> <sup>2</sup> )/3 |
| <b>Largest diff. peak and hole</b>      | 1.034 and -0.630 eÅ <sup>-3</sup>                                                                                                                              |
| <b>R.M.S. deviation from mean</b>       | 0.089 eÅ <sup>-3</sup>                                                                                                                                         |

## 1.5 Crystallographic data for complex 4.

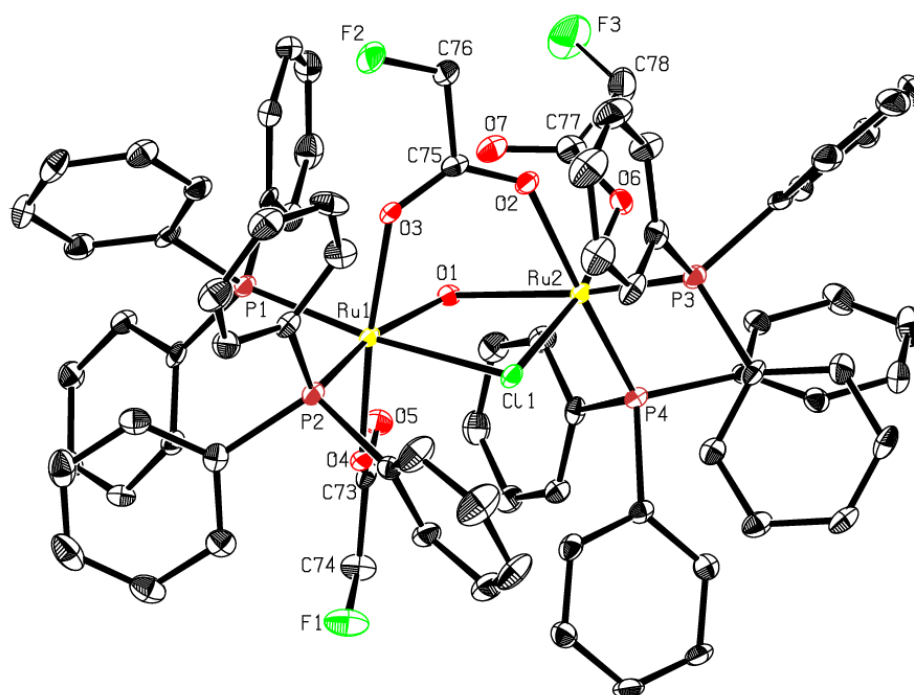

Figure S1.5. ORTEP style drawing of dinuclear complex **4** with ellipsoids at 50% probability level. All hydrogen atoms were omitted for clarity, hydrogens on O1 could be located in the difference Fourier maps.

A clear yellow fragment-like specimen of  $C_{80}H_{72}Cl_5F_3O_7P_4Ru_2$ , approximate dimensions 0.103 mm x 0.172 mm x 0.272 mm, was used for the X-ray crystallographic analysis. The X-ray intensity data were measured on a Bruker D8 Kappa Apex II system equipped with a Triumph monochromator monochromator and a Mo fine-focus sealed tube ( $\lambda = 0.71073 \text{ \AA}$ ).

A total of 4757 frames were collected. The total exposure time was 13.21 hours. The frames were integrated with the Bruker SAINT software package using a narrow-frame algorithm. The integration of the data using a monoclinic unit cell yielded a total of 76154 reflections to a maximum  $\theta$  angle of  $25.03^\circ$  ( $0.84 \text{ \AA}$  resolution), of which 13286 were independent (average redundancy 5.732, completeness = 100.0%,  $R_{\text{int}} = 9.67\%$ ,  $R_{\text{sig}} = 7.75\%$ ) and 9354 (70.40%) were greater than  $2\sigma(F^2)$ . The final cell constants of  $a = 13.584(3) \text{ \AA}$ ,  $b = 39.646(9) \text{ \AA}$ ,  $c = 14.247(3) \text{ \AA}$ ,  $\beta = 100.978(13)^\circ$ , volume =  $7532.3 \text{ \AA}^3$ , are based upon the refinement of the XYZ-centroids of 9587 reflections above  $20\sigma(I)$  with  $4.604^\circ < 2\theta < 50.74^\circ$ . Data were corrected for absorption effects using the Multi-Scan method (SADABS). The ratio of minimum to maximum apparent transmission was 0.862. The calculated minimum and maximum transmission coefficients (based on crystal size) are 0.8270 and 0.9290.

The final anisotropic full-matrix least-squares refinement on  $F^2$  with 965 variables converged at  $R1 = 4.86\%$ , for the observed data and  $wR2 = 12.49\%$  for all data. The goodness-of-fit was 1.025. The largest peak in the final difference electron density synthesis was  $1.444 \text{ e}/\text{\AA}^3$  and the largest hole was  $-1.629 \text{ e}/\text{\AA}^3$  with an RMS deviation of  $0.113 \text{ e}/\text{\AA}^3$ . On the basis of the final model, the calculated density was  $1.504 \text{ g}/\text{cm}^3$  and  $F(000)$ , 3472 e $^-$ .

Table 1.5.1. Sample and crystal data for **4**.

|                               |                                                                                                              |
|-------------------------------|--------------------------------------------------------------------------------------------------------------|
| <b>CCDC number</b>            | 1892672                                                                                                      |
| <b>Chemical formula</b>       | C <sub>80</sub> H <sub>72</sub> Cl <sub>5</sub> F <sub>3</sub> O <sub>7</sub> P <sub>4</sub> Ru <sub>2</sub> |
| <b>Formula weight</b>         | 1705.64                                                                                                      |
| <b>Temperature</b>            | 100(2) K                                                                                                     |
| <b>Wavelength</b>             | 0.71073 Å                                                                                                    |
| <b>Crystal size</b>           | 0.103 x 0.172 x 0.272 mm                                                                                     |
| <b>Crystal habit</b>          | clear yellow fragment                                                                                        |
| <b>Crystal system</b>         | monoclinic                                                                                                   |
| <b>Space group</b>            | P 1 21/n 1                                                                                                   |
| <b>Unit cell dimensions</b>   | a = 13.584(3) Å      α = 90°<br>b = 39.646(9) Å      β = 100.978(13)°<br>c = 14.247(3) Å      γ = 90°        |
| <b>Volume</b>                 | 7532.(3) Å <sup>3</sup>                                                                                      |
| <b>Z</b>                      | 4                                                                                                            |
| <b>Density (calculated)</b>   | 1.504 g/cm <sup>3</sup>                                                                                      |
| <b>Absorption coefficient</b> | 0.725 mm <sup>-1</sup>                                                                                       |
| <b>F(000)</b>                 | 3472                                                                                                         |

Table 1.5.2. Data collection and structure refinement for **4**.

|                                            |                                                                                                                                                                        |
|--------------------------------------------|------------------------------------------------------------------------------------------------------------------------------------------------------------------------|
| <b>Diffractometer</b>                      | Bruker D8 Kappa Apex II                                                                                                                                                |
| <b>Radiation source</b>                    | fine-focus sealed tube, Mo                                                                                                                                             |
| <b>Theta range for data collection</b>     | 1.03 to 25.03°                                                                                                                                                         |
| <b>Index ranges</b>                        | -16 ≤ h ≤ 16, -47 ≤ k ≤ 46, -16 ≤ l ≤ 16                                                                                                                               |
| <b>Reflections collected</b>               | 76154                                                                                                                                                                  |
| <b>Independent reflections</b>             | 13286 [R(int) = 0.0967]                                                                                                                                                |
| <b>Coverage of independent reflections</b> | 100.0%                                                                                                                                                                 |
| <b>Absorption correction</b>               | Multi-Scan                                                                                                                                                             |
| <b>Max. and min. transmission</b>          | 0.9290 and 0.8270                                                                                                                                                      |
| <b>Refinement method</b>                   | Full-matrix least-squares on F <sup>2</sup>                                                                                                                            |
| <b>Refinement program</b>                  | SHELXL-2016/6 (Sheldrick, 2016)                                                                                                                                        |
| <b>Function minimized</b>                  | Σ w(F <sub>o</sub> <sup>2</sup> - F <sub>c</sub> <sup>2</sup> ) <sup>2</sup>                                                                                           |
| <b>Data / restraints / parameters</b>      | 13286 / 104 / 965                                                                                                                                                      |
| <b>Goodness-of-fit on F<sup>2</sup></b>    | 1.025                                                                                                                                                                  |
| <b>Δ/σ<sub>max</sub></b>                   | 0.001                                                                                                                                                                  |
| <b>Final R indices</b>                     | 9354<br>data;      R1 = 0.0486, wR2 = 0.1102<br>I > 2σ(I)<br>all data    R1 = 0.0832, wR2 = 0.1249                                                                     |
| <b>Weighting scheme</b>                    | w = 1/[σ <sup>2</sup> (F <sub>o</sub> <sup>2</sup> ) + (0.0569P) <sup>2</sup> + 10.9304P]<br>where P = (F <sub>o</sub> <sup>2</sup> + 2F <sub>c</sub> <sup>2</sup> )/3 |
| <b>Largest diff. peak and hole</b>         | 1.444 and -1.629 eÅ <sup>-3</sup>                                                                                                                                      |
| <b>R.M.S. deviation from mean</b>          | 0.113 eÅ <sup>-3</sup>                                                                                                                                                 |

## 1.6 Crystallographic data for complex **6**.

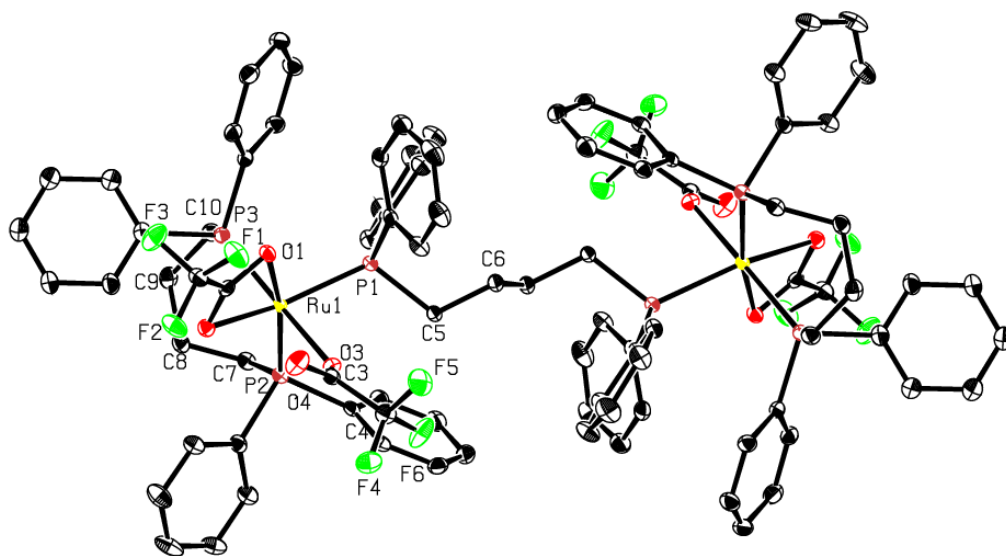

Figure S1.6. ORTEP style drawing of **6** with ellipsoids at 50% probability level. Hydrogen atoms were omitted for clarity.

A clear yellow fragment-like specimen of  $C_{92}H_{84}F_{12}O_8P_6Ru_2$ , approximate dimensions 0.039 mm x 0.092 mm x 0.187 mm, was used for the X-ray crystallographic analysis. The X-ray intensity data were measured on a Bruker D8 Venture Duo IMS system equipped with a Helios optic monochromator and a Mo IMS microsource ( $\lambda = 0.71073 \text{ \AA}$ ).

A total of 2009 frames were collected. The total exposure time was 15.39 hours. The frames were integrated with the Bruker SAINT software package using a narrow-frame algorithm. The integration of the data using a triclinic unit cell yielded a total of 61100 reflections to a maximum  $\theta$  angle of  $25.03^\circ$  ( $0.84 \text{ \AA}$  resolution), of which 7762 were independent (average redundancy 7.872, completeness = 100.0%,  $R_{\text{int}} = 3.87\%$ ,  $R_{\text{sig}} = 1.96\%$ ) and 7147 (92.08%) were greater than  $2\sigma(F^2)$ . The final cell constants of  $a = 10.8399(6) \text{ \AA}$ ,  $b = 11.0183(6) \text{ \AA}$ ,  $c = 21.0415(12) \text{ \AA}$ ,  $\alpha = 95.630(2)^\circ$ ,  $\beta = 101.051(2)^\circ$ ,  $\gamma = 114.300(2)^\circ$ , volume =  $2203.6(2) \text{ \AA}^3$ , are based upon the refinement of the XYZ-centroids of 9388 reflections above  $20 \sigma(I)$  with  $4.445^\circ < 2\theta < 51.33^\circ$ . Data were corrected for absorption effects using the Multi-Scan method (SADABS). The ratio of minimum to maximum apparent transmission was 0.953. The calculated minimum and maximum transmission coefficients (based on crystal size) are 0.9070 and 0.9800.

The structure was solved and refined using the Bruker SHELXTL Software Package in conjunction with SHELXLE, using the space group  $P -1$ , with  $Z = 1$  for the formula unit,  $C_{92}H_{84}F_{12}O_8P_6Ru_2$ . The final anisotropic full-matrix least-squares refinement on  $F^2$  with 542 variables converged at  $R1 = 3.37\%$ , for the observed data and  $wR2 = 6.85\%$  for all data. The goodness-of-fit was 1.069. The largest peak in the final difference electron density synthesis was  $1.211 \text{ e}/\text{\AA}^3$  and the largest hole was  $-1.314 \text{ e}/\text{\AA}^3$  with an RMS deviation of  $0.071 \text{ e}/\text{\AA}^3$ . On the basis of the final model, the calculated density was  $1.457 \text{ g}/\text{cm}^3$  and  $F(000)$ , 986 e $^-$ .

Table 1.6.1. Sample and crystal data for **6**.

|                               |                                                                                               |                 |
|-------------------------------|-----------------------------------------------------------------------------------------------|-----------------|
| <b>CCDC number</b>            | 1892669                                                                                       |                 |
| <b>Chemical formula</b>       | C <sub>92</sub> H <sub>84</sub> F <sub>12</sub> O <sub>8</sub> P <sub>6</sub> Ru <sub>2</sub> |                 |
| <b>Formula weight</b>         | 1933.55                                                                                       |                 |
| <b>Temperature</b>            | 100(2) K                                                                                      |                 |
| <b>Wavelength</b>             | 0.71073 Å                                                                                     |                 |
| <b>Crystal size</b>           | 0.039 x 0.092 x 0.187 mm                                                                      |                 |
| <b>Crystal habit</b>          | clear yellow fragment                                                                         |                 |
| <b>Crystal system</b>         | triclinic                                                                                     |                 |
| <b>Space group</b>            | P -1                                                                                          |                 |
| <b>Unit cell dimensions</b>   | a = 10.8399(6) Å                                                                              | α = 95.630(2)°  |
|                               | b = 11.0183(6) Å                                                                              | β = 101.051(2)° |
|                               | c = 21.0415(12) Å                                                                             | γ = 114.300(2)° |
| <b>Volume</b>                 | 2203.6(2) Å <sup>3</sup>                                                                      |                 |
| <b>Z</b>                      | 1                                                                                             |                 |
| <b>Density (calculated)</b>   | 1.457 g/cm <sup>3</sup>                                                                       |                 |
| <b>Absorption coefficient</b> | 0.532 mm <sup>-1</sup>                                                                        |                 |
| <b>F(000)</b>                 | 986                                                                                           |                 |

Table 1.6.2. Data collection and structure refinement for **6**.

|                                            |                                                                                                                                                               |
|--------------------------------------------|---------------------------------------------------------------------------------------------------------------------------------------------------------------|
| <b>Diffractometer</b>                      | Bruker D8 Venture Duo IMS                                                                                                                                     |
| <b>Radiation source</b>                    | IMS microsource, Mo                                                                                                                                           |
| <b>Theta range for data collection</b>     | 2.01 to 25.03°                                                                                                                                                |
| <b>Index ranges</b>                        | -12<=h<=12, -13<=k<=12, -25<=l<=25                                                                                                                            |
| <b>Reflections collected</b>               | 61100                                                                                                                                                         |
| <b>Independent reflections</b>             | 7762 [R(int) = 0.0387]                                                                                                                                        |
| <b>Coverage of independent reflections</b> | 100.0%                                                                                                                                                        |
| <b>Absorption correction</b>               | Multi-Scan                                                                                                                                                    |
| <b>Max. and min. transmission</b>          | 0.9800 and 0.9070                                                                                                                                             |
| <b>Structure solution technique</b>        | direct methods                                                                                                                                                |
| <b>Structure solution program</b>          | SHELXT 2014/5 (Sheldrick, 2014)                                                                                                                               |
| <b>Refinement method</b>                   | Full-matrix least-squares on F <sup>2</sup>                                                                                                                   |
| <b>Refinement program</b>                  | SHELXL-2016/6 (Sheldrick, 2016)                                                                                                                               |
| <b>Function minimized</b>                  | Σ w(F <sub>o</sub> <sup>2</sup> - F <sub>c</sub> <sup>2</sup> ) <sup>2</sup>                                                                                  |
| <b>Data / restraints / parameters</b>      | 7762 / 66 / 542                                                                                                                                               |
| <b>Goodness-of-fit on F<sup>2</sup></b>    | 1.069                                                                                                                                                         |
| <b>Δ/σ<sub>max</sub></b>                   | 0.001                                                                                                                                                         |
| <b>Final R indices</b>                     | 7147<br>data; R1 = 0.0337, wR2 = 0.0670<br>I>2σ(I)<br>all data R1 = 0.0373, wR2 = 0.0685                                                                      |
| <b>Weighting scheme</b>                    | w=1/[σ <sup>2</sup> (F <sub>o</sub> <sup>2</sup> )+(0.0060P) <sup>2</sup> +5.8589P]<br>where P=(F <sub>o</sub> <sup>2</sup> +2F <sub>c</sub> <sup>2</sup> )/3 |
| <b>Largest diff. peak and hole</b>         | 1.211 and -1.314 eÅ <sup>-3</sup>                                                                                                                             |
| <b>R.M.S. deviation from mean</b>          | 0.071 eÅ <sup>-3</sup>                                                                                                                                        |

## 1.7 Crystallographic data for complex 7.

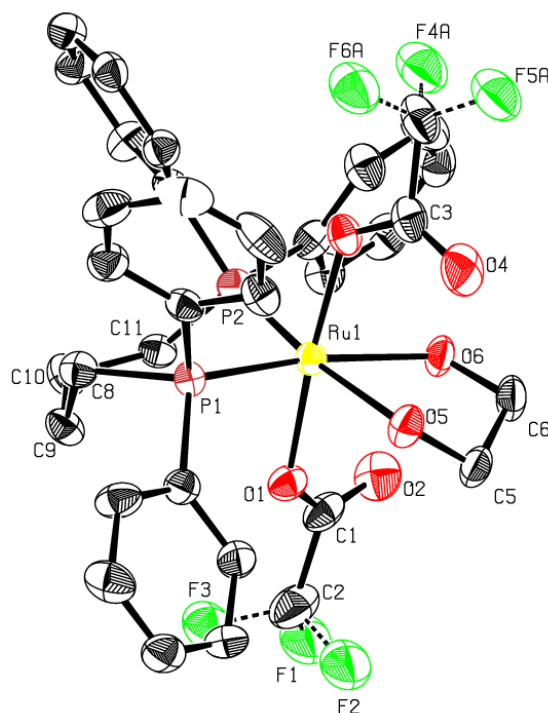

Figure S1.7. ORTEP style drawing of **7** with ellipsoids at 50% probability level. All hydrogen atoms were omitted for clarity, hydrogens on O5 and O6 could be located in the difference Fourier maps.

A yellow fragment-like specimen of  $C_{34}H_{34}F_6O_6P_2Ru$ , approximate dimensions 0.180 mm x 0.310 mm x 0.430 mm, was used for the X-ray crystallographic analysis. The X-ray intensity data were measured on a Bruker D8 Venture Duo IMS system equipped with a Helios optic monochromator and a Mo IMS microsource ( $\lambda = 0.71073 \text{ \AA}$ ).

A total of 947 frames were collected. The total exposure time was 2.18 hours. The integration of the data using an orthorhombic unit cell yielded a total of 40954 reflections to a maximum  $\theta$  angle of  $25.02^\circ$  ( $0.84 \text{ \AA}$  resolution), of which 5799 were independent (average redundancy 7.062, completeness = 100.0%,  $R_{int} = 10.98\%$ ,  $R_{sig} = 6.52\%$ ) and 4938 (85.15%) were greater than  $2\sigma(F^2)$ . The final cell constants of  $\underline{a} = 18.484(6) \text{ \AA}$ ,  $\underline{b} = 10.708(3) \text{ \AA}$ ,  $\underline{c} = 17.311(6) \text{ \AA}$ , volume =  $3426.3(18) \text{ \AA}^3$ , are based upon the refinement of the XYZ-centroids of reflections above  $20 \sigma(I)$ . The calculated minimum and maximum transmission coefficients (based on crystal size) are 0.7740 and 0.8950.

The structure was solved and refined using the Bruker SHELXTL Software Package in conjunction with SHELXLE, using the space group  $Pn\bar{a}2_1$ , with  $Z = 4$  for the formula unit,  $C_{34}H_{32}F_6O_6P_2Ru$ . The final anisotropic full-matrix least-squares refinement on  $F^2$  with 498 variables converged at  $R1 = 4.29\%$ , for the observed data and  $wR2 = 11.27\%$  for all data. The goodness-of-fit was 1.076. The largest peak in the final difference electron density synthesis was  $0.739 \text{ e}/\text{\AA}^3$  and the largest hole was  $-0.732 \text{ e}/\text{\AA}^3$  with an RMS deviation of  $0.091 \text{ e}/\text{\AA}^3$ . On the basis of the final model, the calculated density was  $1.577 \text{ g}/\text{cm}^3$  and  $F(000)$ , 1648 e $^-$ .

Table 1.7.1. Sample and crystal data for **7**.

|                               |                                                                                 |         |
|-------------------------------|---------------------------------------------------------------------------------|---------|
| <b>CCDC number</b>            | 1892668                                                                         |         |
| <b>Chemical formula</b>       | C <sub>34</sub> H <sub>34</sub> F <sub>6</sub> O <sub>6</sub> P <sub>2</sub> Ru |         |
| <b>Formula weight</b>         | 813.60                                                                          |         |
| <b>Temperature</b>            | 100(2) K                                                                        |         |
| <b>Wavelength</b>             | 0.71073 Å                                                                       |         |
| <b>Crystal size</b>           | 0.180 x 0.310 x 0.430 mm                                                        |         |
| <b>Crystal habit</b>          | yellow fragment                                                                 |         |
| <b>Crystal system</b>         | orthorhombic                                                                    |         |
| <b>Space group</b>            | P n a 21                                                                        |         |
| <b>Unit cell dimensions</b>   | a = 18.484(6) Å                                                                 | α = 90° |
|                               | b = 10.708(3) Å                                                                 | β = 90° |
|                               | c = 17.311(6) Å                                                                 | γ = 90° |
| <b>Volume</b>                 | 3426.3(18) Å <sup>3</sup>                                                       |         |
| <b>Z</b>                      | 4                                                                               |         |
| <b>Density (calculated)</b>   | 1.577 g/cm <sup>3</sup>                                                         |         |
| <b>Absorption coefficient</b> | 0.628 mm <sup>-1</sup>                                                          |         |
| <b>F(000)</b>                 | 1648                                                                            |         |

Table 1.7.2. Data collection and structure refinement for **7**.

|                                         |                                                                                                                                                                       |                           |
|-----------------------------------------|-----------------------------------------------------------------------------------------------------------------------------------------------------------------------|---------------------------|
| <b>Diffractometer</b>                   | Bruker D8 Venture Duo IMS                                                                                                                                             |                           |
| <b>Radiation source</b>                 | IMS microsource, Mo                                                                                                                                                   |                           |
| <b>Theta range for data collection</b>  | 2.20 to 25.02°                                                                                                                                                        |                           |
| <b>Index ranges</b>                     | -22 ≤ h ≤ 22, -12 ≤ k ≤ 12, -20 ≤ l ≤ 18                                                                                                                              |                           |
| <b>Reflections collected</b>            | 40954                                                                                                                                                                 |                           |
| <b>Independent reflections</b>          | 5799 [R(int) = 0.1098]                                                                                                                                                |                           |
| <b>Max. and min. transmission</b>       | 0.8950 and 0.7740                                                                                                                                                     |                           |
| <b>Structure solution technique</b>     | direct methods                                                                                                                                                        |                           |
| <b>Structure solution program</b>       | SHELXT 2014/5 (Sheldrick, 2014)                                                                                                                                       |                           |
| <b>Refinement method</b>                | Full-matrix least-squares on F <sup>2</sup>                                                                                                                           |                           |
| <b>Refinement program</b>               | SHELXL-2014/7 (Sheldrick, 2014)                                                                                                                                       |                           |
| <b>Function minimized</b>               | Σ w(F <sub>o</sub> <sup>2</sup> - F <sub>c</sub> <sup>2</sup> ) <sup>2</sup>                                                                                          |                           |
| <b>Data / restraints / parameters</b>   | 5799 / 79 / 498                                                                                                                                                       |                           |
| <b>Goodness-of-fit on F<sup>2</sup></b> | 1.076                                                                                                                                                                 |                           |
| <b>Final R indices</b>                  | 4938 data;<br>I > 2σ(I)                                                                                                                                               | R1 = 0.0429, wR2 = 0.0977 |
|                                         | all data                                                                                                                                                              | R1 = 0.0595, wR2 = 0.1127 |
| <b>Weighting scheme</b>                 | w = 1/[σ <sup>2</sup> (F <sub>o</sub> <sup>2</sup> ) + (0.0295P) <sup>2</sup> + 7.2904P]<br>where P = (F <sub>o</sub> <sup>2</sup> + 2F <sub>c</sub> <sup>2</sup> )/3 |                           |
| <b>Absolute structure parameter</b>     | 0.0(0)                                                                                                                                                                |                           |
| <b>Largest diff. peak and hole</b>      | 0.739 and -0.732 eÅ <sup>-3</sup>                                                                                                                                     |                           |
| <b>R.M.S. deviation from mean</b>       | 0.091 eÅ <sup>-3</sup>                                                                                                                                                |                           |



## 1.8 Crystallographic data for complex **8**.

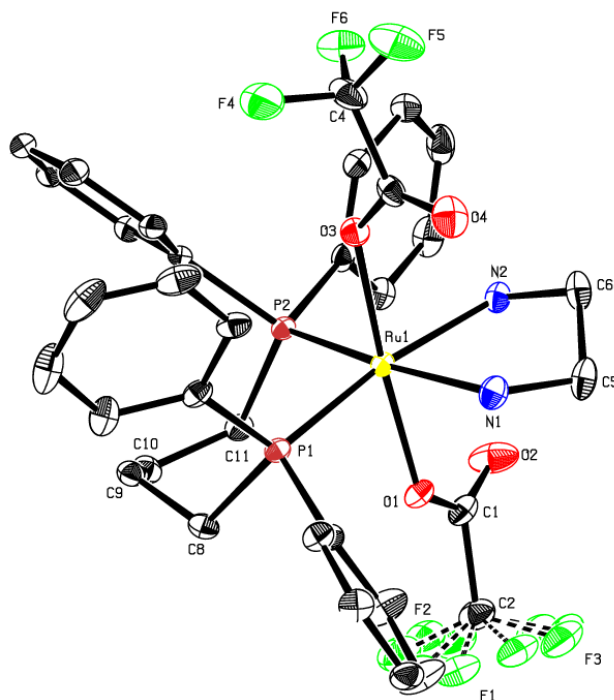

Figure S1.8. ORTEP style drawing of **8** with ellipsoids at 50% probability level. All hydrogen atoms were omitted for clarity, hydrogens on N1 and N2 could be located in the difference Fourier maps.

A clear yellow fragment-like specimen of  $C_{34}H_{36}F_6N_2O_4P_2Ru$ , approximate dimensions 0.065 mm x 0.074 mm x 0.227 mm, was used for the X-ray crystallographic analysis. The X-ray intensity data were measured on a Bruker D8 Venture system equipped with a Helios optic monochromator and a Mo TXS rotating anode ( $\lambda = 0.71073 \text{ \AA}$ ).

A total of 2600 frames were collected. The total exposure time was 6.77 hours. The frames were integrated with the Bruker SAINT software package using a narrow-frame algorithm. The integration of the data using a triclinic unit cell yielded a total of 68362 reflections to a maximum  $\theta$  angle of  $25.03^\circ$  (0.84  $\text{\AA}$  resolution), of which 6045 were independent (average redundancy 11.309, completeness = 99.9%,  $R_{\text{int}} = 3.16\%$ ,  $R_{\text{sig}} = 1.32\%$ ) and 5566 (92.08%) were greater than  $2\sigma(F^2)$ . The final cell constants of  $a = 10.6493(8) \text{ \AA}$ ,  $b = 10.9413(8) \text{ \AA}$ ,  $c = 17.1095(13) \text{ \AA}$ ,  $\alpha = 72.020(3)^\circ$ ,  $\beta = 77.186(3)^\circ$ ,  $\gamma = 65.201(3)^\circ$ , volume =  $1711.5(2) \text{ \AA}^3$ , are based upon the refinement of the XYZ-centroids of 9866 reflections above  $20 \sigma(I)$  with  $4.719^\circ < 2\theta < 51.48^\circ$ . Data were corrected for absorption effects using the Multi-Scan method (SADABS). The ratio of minimum to maximum apparent transmission was 0.960. The calculated minimum and maximum transmission coefficients (based on crystal size) are 0.8710 and 0.9600.

The structure was solved and refined using the Bruker SHELXTL Software Package in conjunction with SHELXLE, using the space group  $P -1$ , with  $Z = 2$  for the formula unit,  $C_{34}H_{36}F_6N_2O_4P_2Ru$ . The final anisotropic full-matrix least-squares refinement on  $F^2$  with 511 variables converged at  $R1 = 2.37\%$ , for the observed data and  $wR2 = 5.67\%$  for all data. The goodness-of-fit was 1.053. The largest peak in the final difference electron density synthesis was  $0.611 \text{ e}/\text{\AA}^3$  and the largest hole was  $-0.656 \text{ e}/\text{\AA}^3$  with an RMS deviation of  $0.060 \text{ e}/\text{\AA}^3$ . On the basis of the final model, the calculated density was  $1.579 \text{ g}/\text{cm}^3$  and  $F(000)$ , 828 e $^-$ .

Table 1.8.1. Sample and crystal data for **8**.

|                               |                                                                                                |                |
|-------------------------------|------------------------------------------------------------------------------------------------|----------------|
| <b>CCDC number</b>            | 1892674                                                                                        |                |
| <b>Chemical formula</b>       | C <sub>34</sub> H <sub>36</sub> F <sub>6</sub> N <sub>2</sub> O <sub>4</sub> P <sub>2</sub> Ru |                |
| <b>Formula weight</b>         | 813.66                                                                                         |                |
| <b>Temperature</b>            | 100(2) K                                                                                       |                |
| <b>Wavelength</b>             | 0.71073 Å                                                                                      |                |
| <b>Crystal size</b>           | 0.065 x 0.074 x 0.227 mm                                                                       |                |
| <b>Crystal habit</b>          | clear yellow fragment                                                                          |                |
| <b>Crystal system</b>         | triclinic                                                                                      |                |
| <b>Space group</b>            | P -1                                                                                           |                |
| <b>Unit cell dimensions</b>   | a = 10.6493(8) Å                                                                               | α = 72.020(3)° |
|                               | b = 10.9413(8) Å                                                                               | β = 77.186(3)° |
|                               | c = 17.1095(13) Å                                                                              | γ = 65.201(3)° |
| <b>Volume</b>                 | 1711.5(2) Å <sup>3</sup>                                                                       |                |
| <b>Z</b>                      | 2                                                                                              |                |
| <b>Density (calculated)</b>   | 1.579 g/cm <sup>3</sup>                                                                        |                |
| <b>Absorption coefficient</b> | 0.625 mm <sup>-1</sup>                                                                         |                |
| <b>F(000)</b>                 | 828                                                                                            |                |

Table 1.8.2. Data collection and structure refinement for **8**.

|                                            |                                                                                                                                                               |
|--------------------------------------------|---------------------------------------------------------------------------------------------------------------------------------------------------------------|
| <b>Diffractometer</b>                      | Bruker D8 Venture                                                                                                                                             |
| <b>Radiation source</b>                    | TXS rotating anode, Mo                                                                                                                                        |
| <b>Theta range for data collection</b>     | 2.35 to 25.03°                                                                                                                                                |
| <b>Index ranges</b>                        | -12<=h<=12, -13<=k<=13, -20<=l<=20                                                                                                                            |
| <b>Reflections collected</b>               | 68362                                                                                                                                                         |
| <b>Independent reflections</b>             | 6045 [R(int) = 0.0316]                                                                                                                                        |
| <b>Coverage of independent reflections</b> | 99.9%                                                                                                                                                         |
| <b>Absorption correction</b>               | Multi-Scan                                                                                                                                                    |
| <b>Max. and min. transmission</b>          | 0.9600 and 0.8710                                                                                                                                             |
| <b>Structure solution technique</b>        | direct methods                                                                                                                                                |
| <b>Structure solution program</b>          | SHELXT 2014/5 (Sheldrick, 2014)                                                                                                                               |
| <b>Refinement method</b>                   | Full-matrix least-squares on F <sup>2</sup>                                                                                                                   |
| <b>Refinement program</b>                  | SHELXL-2014/7 (Sheldrick, 2014)                                                                                                                               |
| <b>Function minimized</b>                  | Σ w(F <sub>o</sub> <sup>2</sup> - F <sub>c</sub> <sup>2</sup> ) <sup>2</sup>                                                                                  |
| <b>Data / restraints / parameters</b>      | 6045 / 118 / 511                                                                                                                                              |
| <b>Goodness-of-fit on F<sup>2</sup></b>    | 1.053                                                                                                                                                         |
| <b>Δ/σ<sub>max</sub></b>                   | 0.009                                                                                                                                                         |
| <b>Final R indices</b>                     | 5566<br>data; R1 = 0.0237, wR2 = 0.0548<br> >2σ(I)<br>all data R1 = 0.0270, wR2 = 0.0567                                                                      |
| <b>Weighting scheme</b>                    | w=1/[σ <sup>2</sup> (F <sub>o</sub> <sup>2</sup> )+(0.0201P) <sup>2</sup> +2.3716P]<br>where P=(F <sub>o</sub> <sup>2</sup> +2F <sub>c</sub> <sup>2</sup> )/3 |
| <b>Largest diff. peak and hole</b>         | 0.611 and -0.656 eÅ <sup>-3</sup>                                                                                                                             |
| <b>R.M.S. deviation from mean</b>          | 0.060 eÅ <sup>-3</sup>                                                                                                                                        |

## 2. NMR spectra

### 2.1 NMR spectra of complex 1.

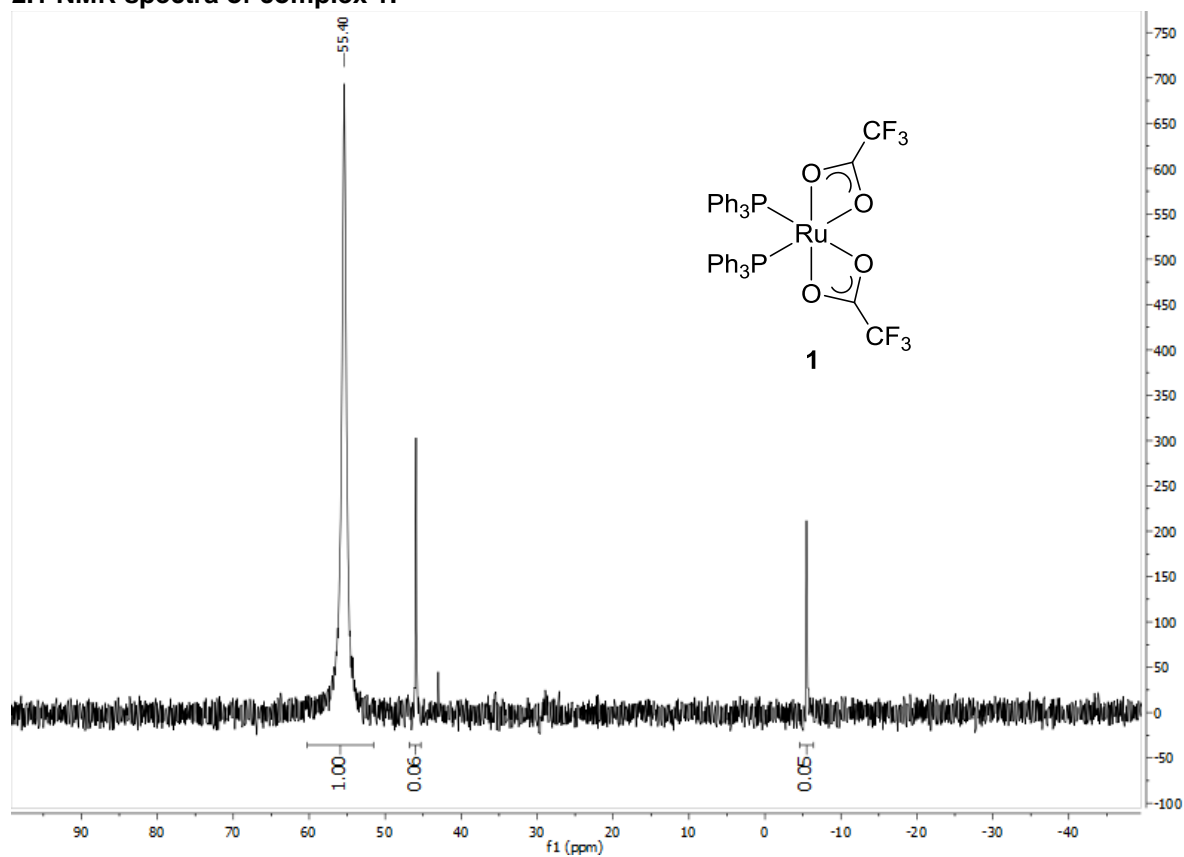

Figure S2.1.1.  $^{31}\text{P}\{^1\text{H}\}$  NMR spectrum of **1** in  $\text{CD}_2\text{Cl}_2$ .

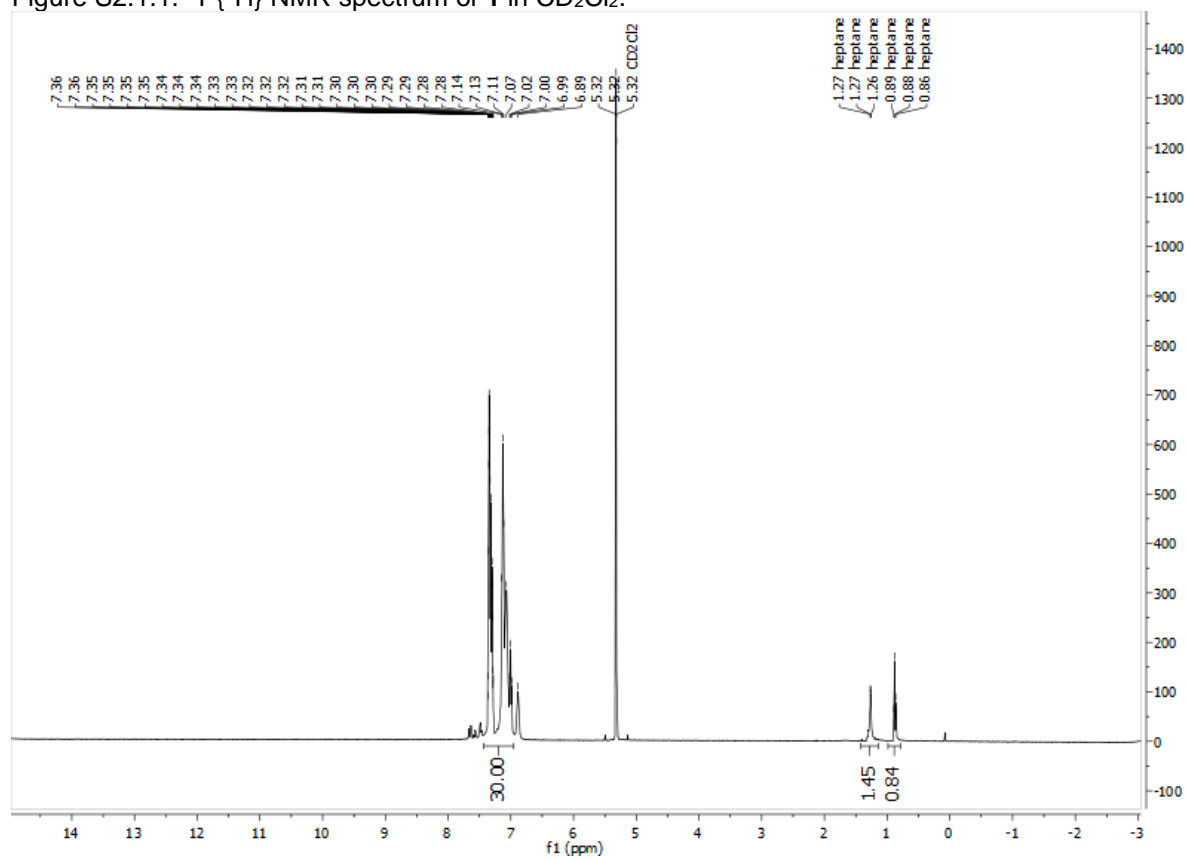

Figure S2.1.2.  $^1\text{H}$  NMR spectrum of **1** in  $\text{CD}_2\text{Cl}_2$ .

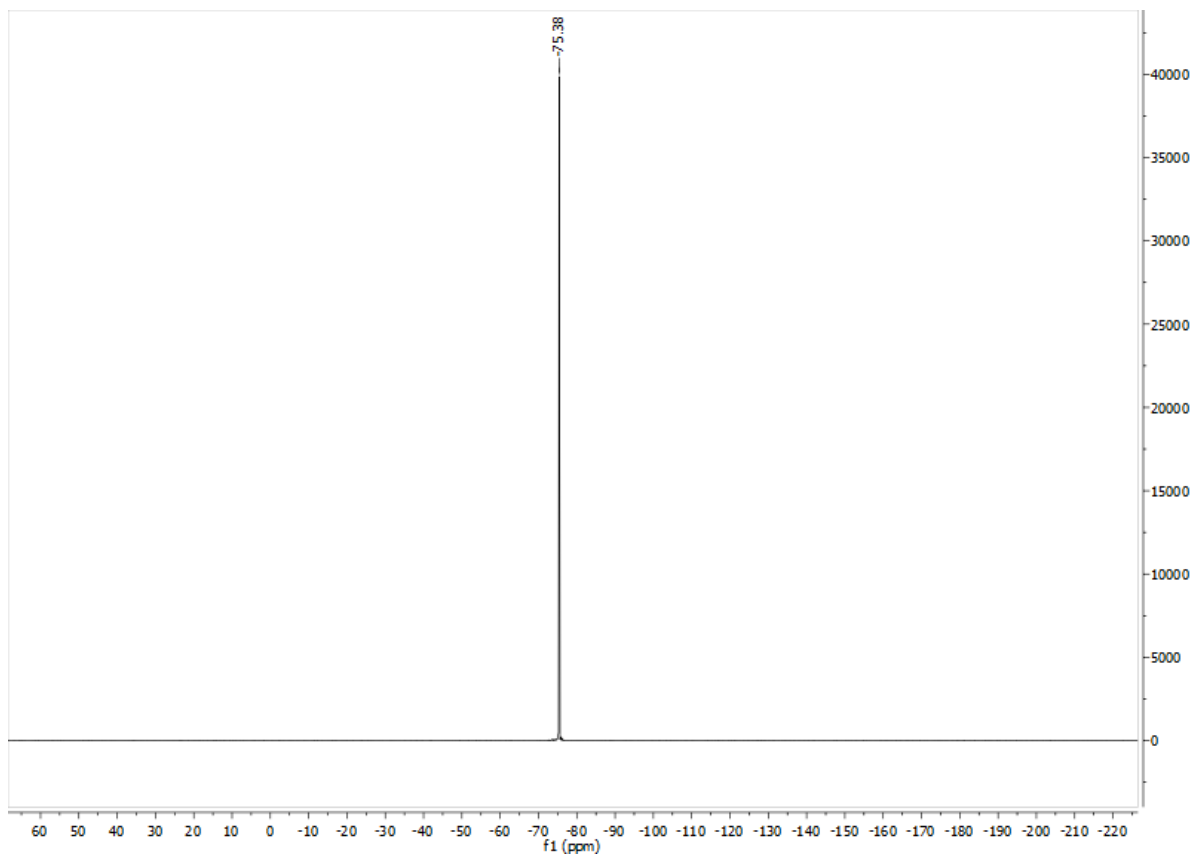

Figure S2.1.3.  $^{19}\text{F}\{^1\text{H}\}$  NMR spectrum of 1 in  $\text{CD}_2\text{Cl}_2$ .

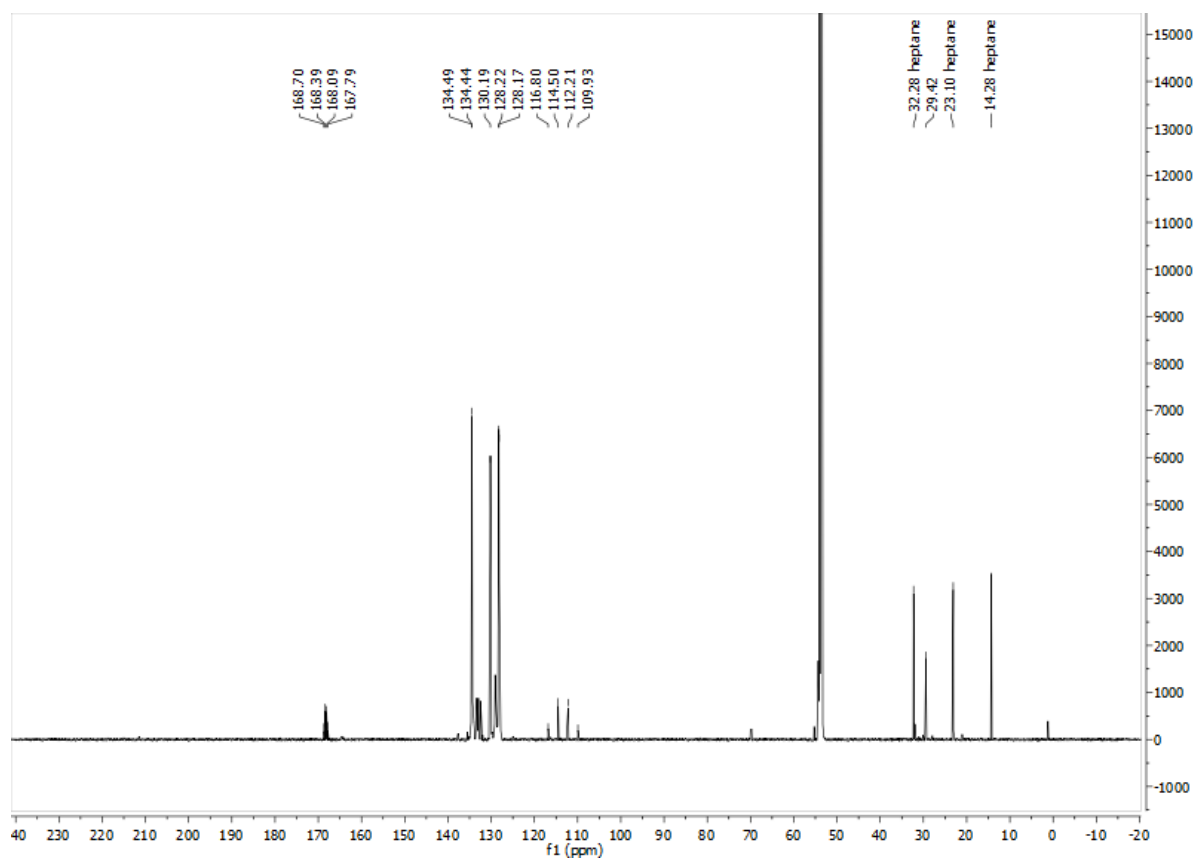

Figure S2.1.4.  $^{13}\text{C}\{^1\text{H}\}$  NMR spectrum of 1 in  $\text{CD}_2\text{Cl}_2$ .

## 2.2 NMR spectra of complex 2.

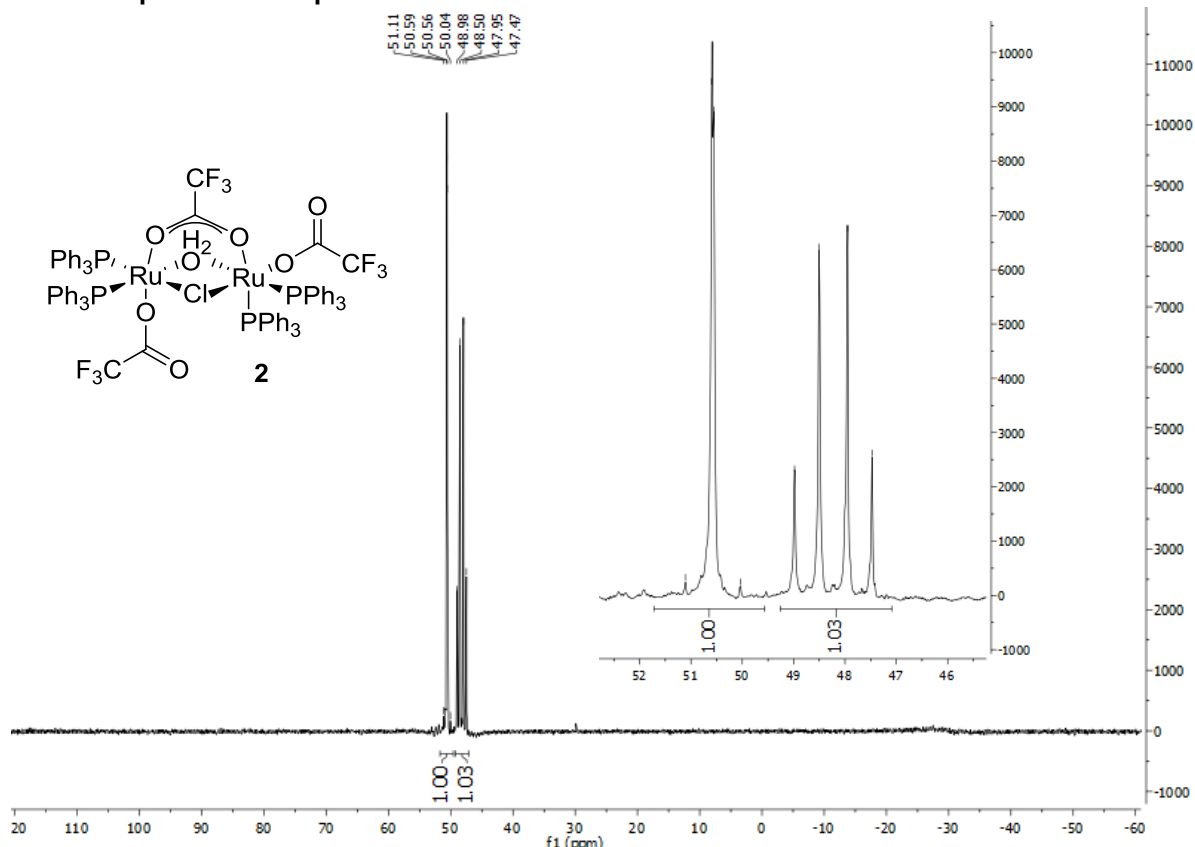

Figure S2.2.1.  $^{31}\text{P}\{^1\text{H}\}$  NMR spectrum of **2** in  $\text{CD}_2\text{Cl}_2$ .

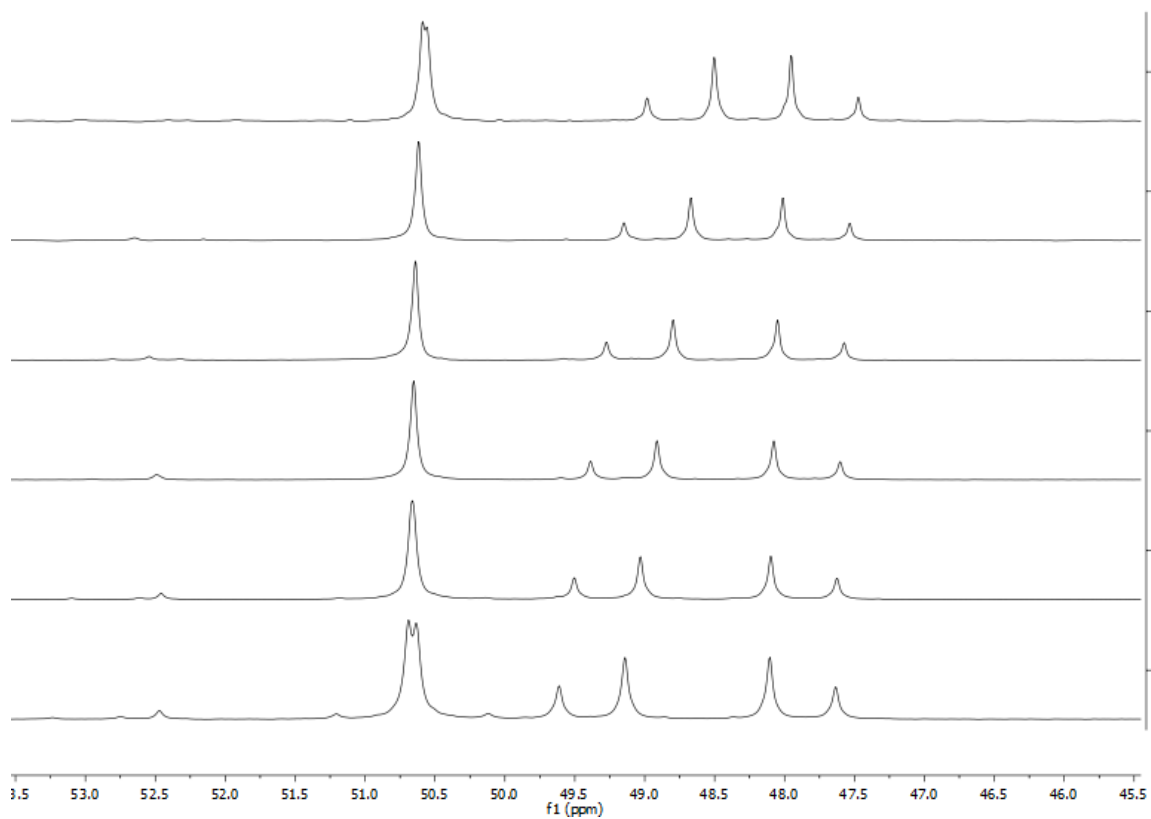

Figure S2.2.2.  $^{31}\text{P}\{^1\text{H}\}$  VT-NMR spectra of **2** in  $\text{CD}_2\text{Cl}_2$ . (1)  $T = -80^\circ\text{C}$ ; (2)  $T = -60^\circ\text{C}$ ; (3)  $T = -40^\circ\text{C}$ ; (4)  $T = -20^\circ\text{C}$ ; (5)  $T = 0^\circ\text{C}$ ; (6)  $T = 20^\circ\text{C}$ .

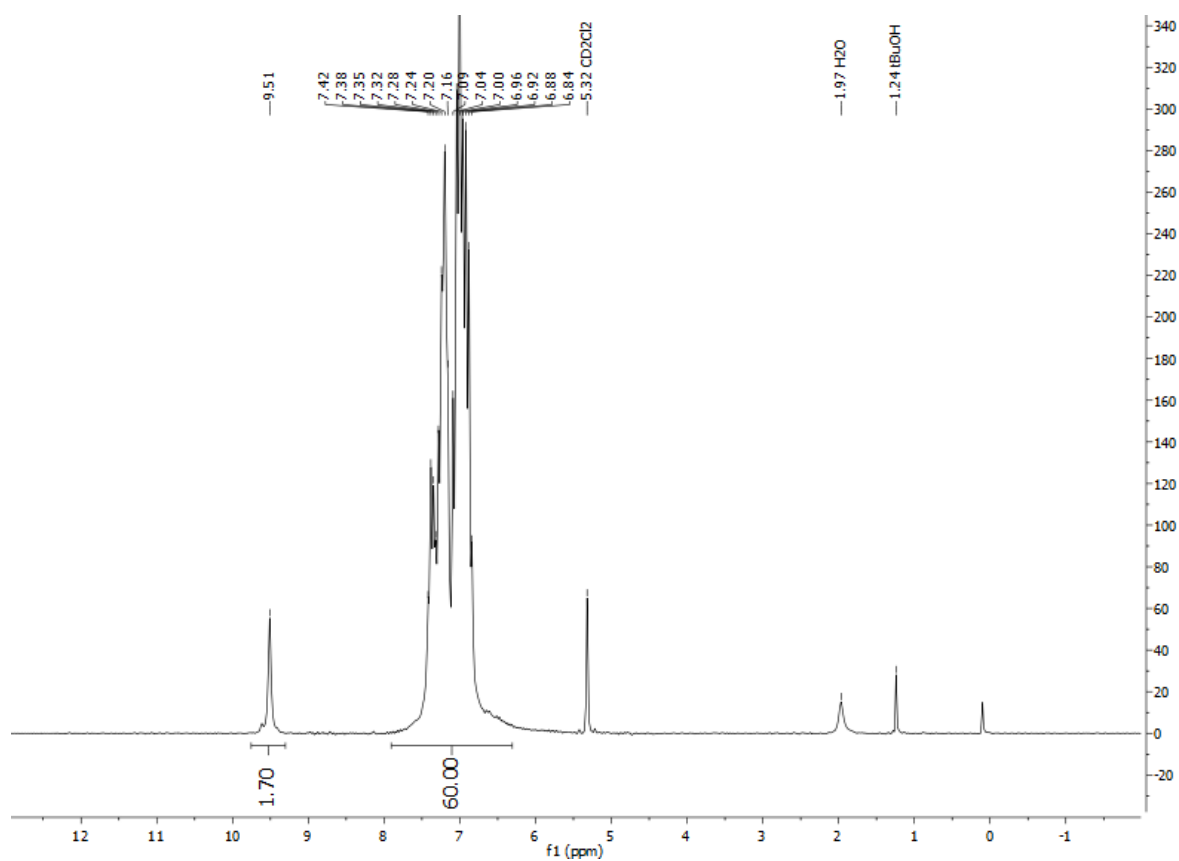

Figure S2.2.3. <sup>1</sup>H NMR spectrum of **2** in CD<sub>2</sub>Cl<sub>2</sub>.

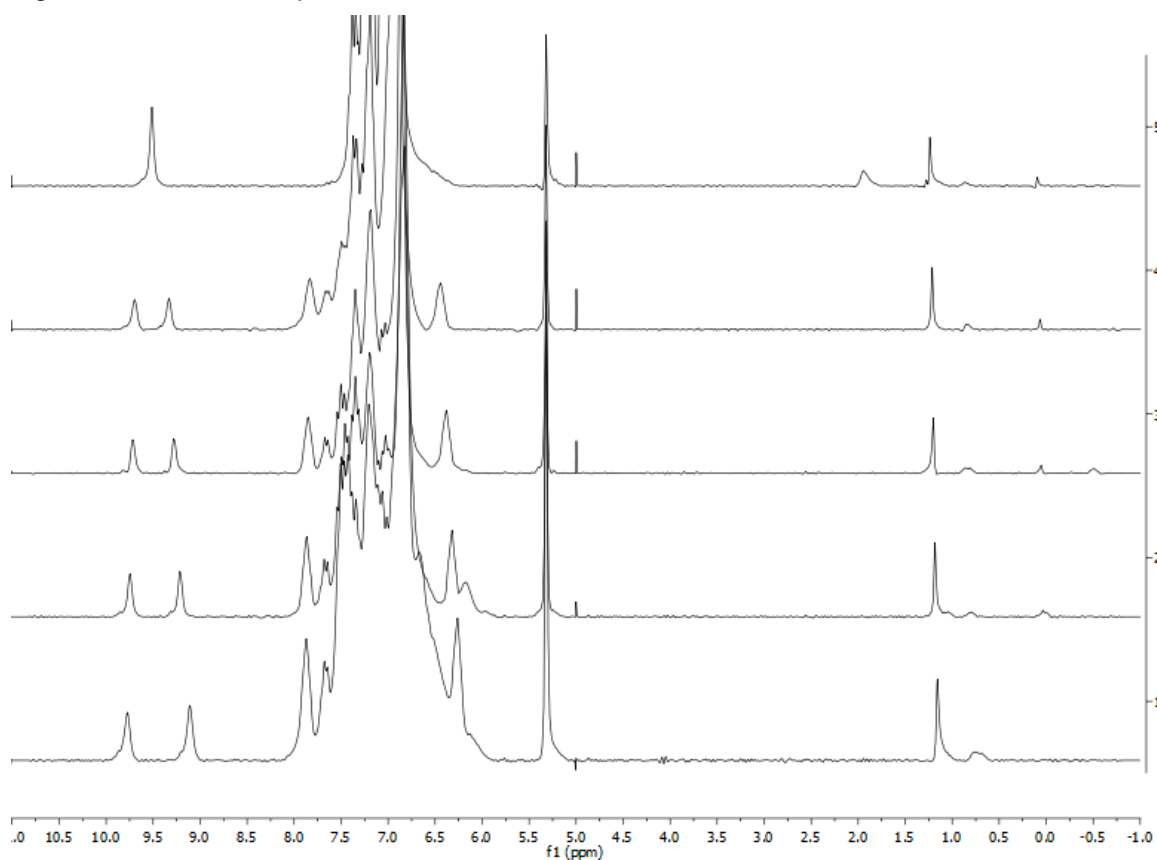

Figure S2.2.4. <sup>1</sup>H VT-NMR spectra of **2** in CD<sub>2</sub>Cl<sub>2</sub>. (1) T = -80°C; (2) T = -60°C; (3) T = -40°C; (4) T = -20°C; (5) T = 20°C.

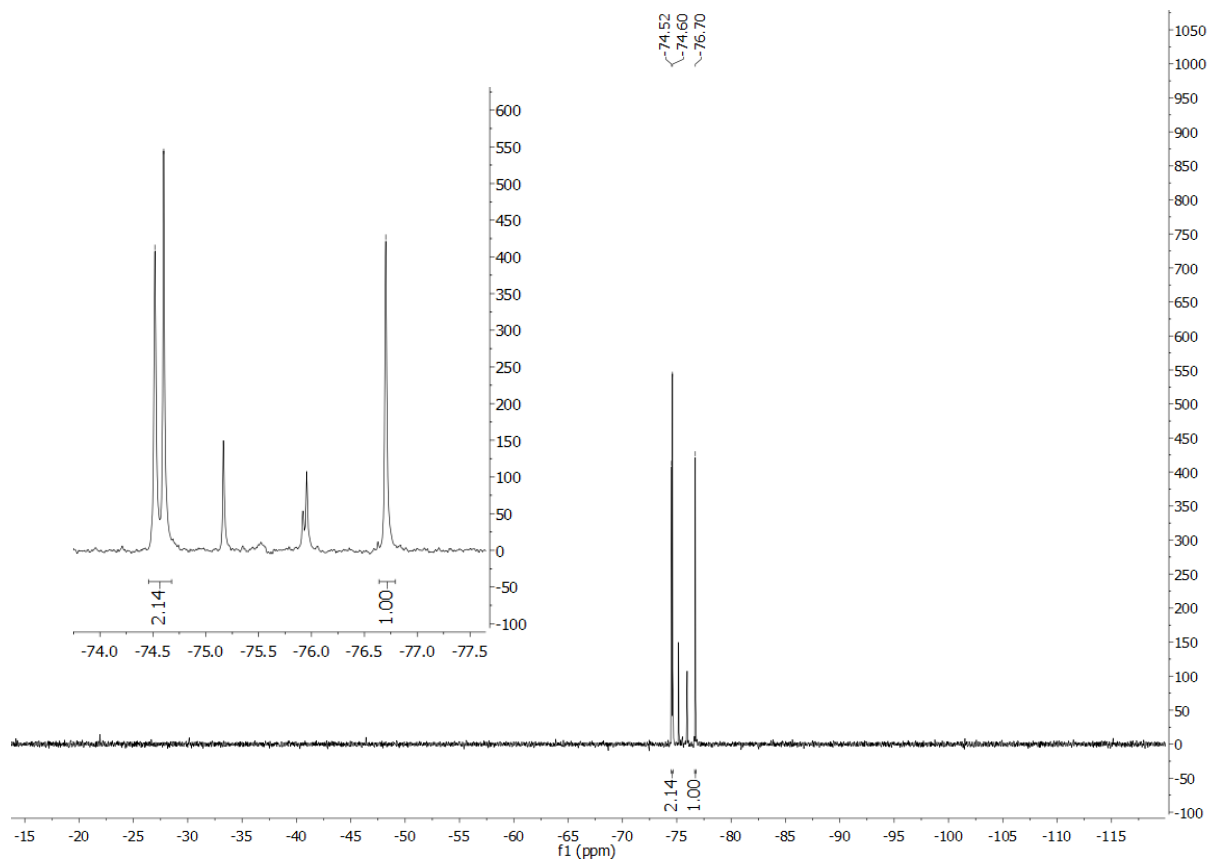

Figure S2.2.5.  $^{19}\text{F}\{^1\text{H}\}$  NMR spectrum of **2** in  $\text{CD}_2\text{Cl}_2$ .

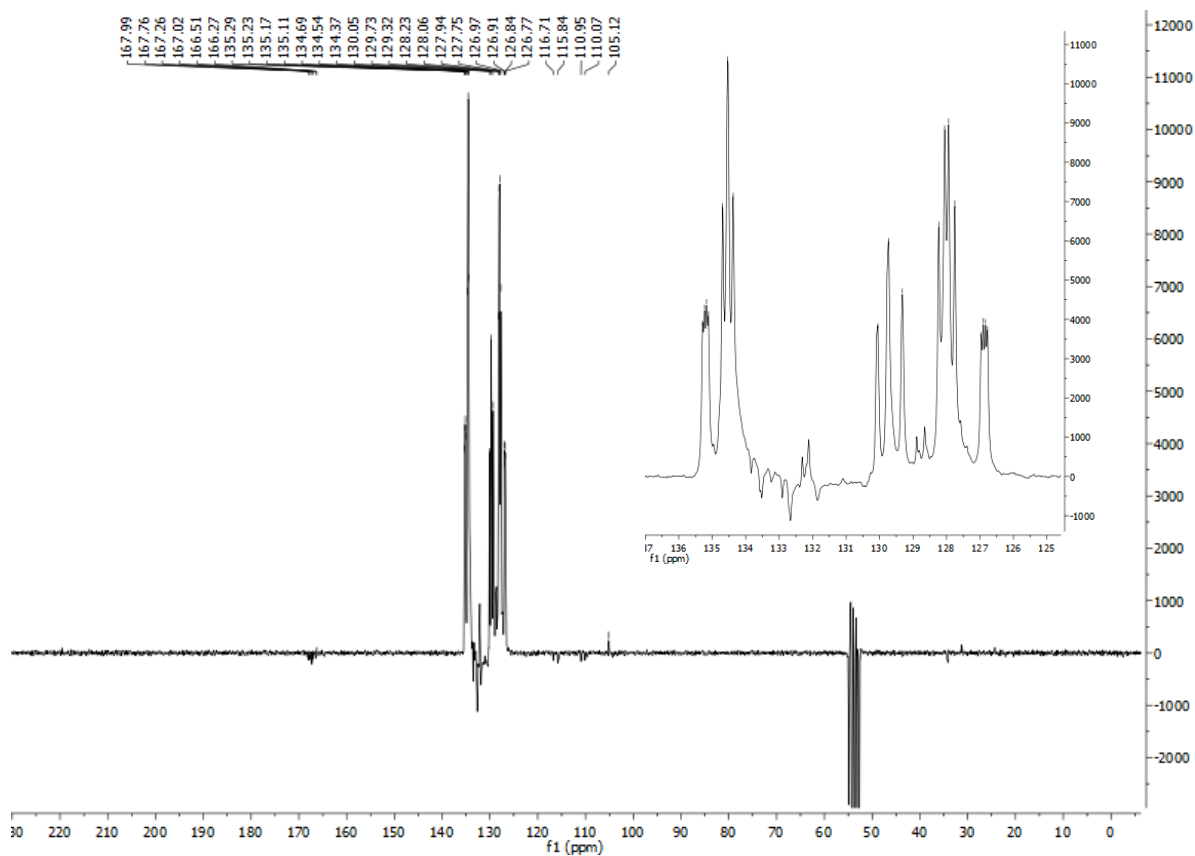

Figure S2.2.6.  $^{13}\text{C}\{^1\text{H}\}$  DEPT NMR spectrum of **2** in  $\text{CD}_2\text{Cl}_2$ .

## 2.3 NMR spectra of complex **3**.

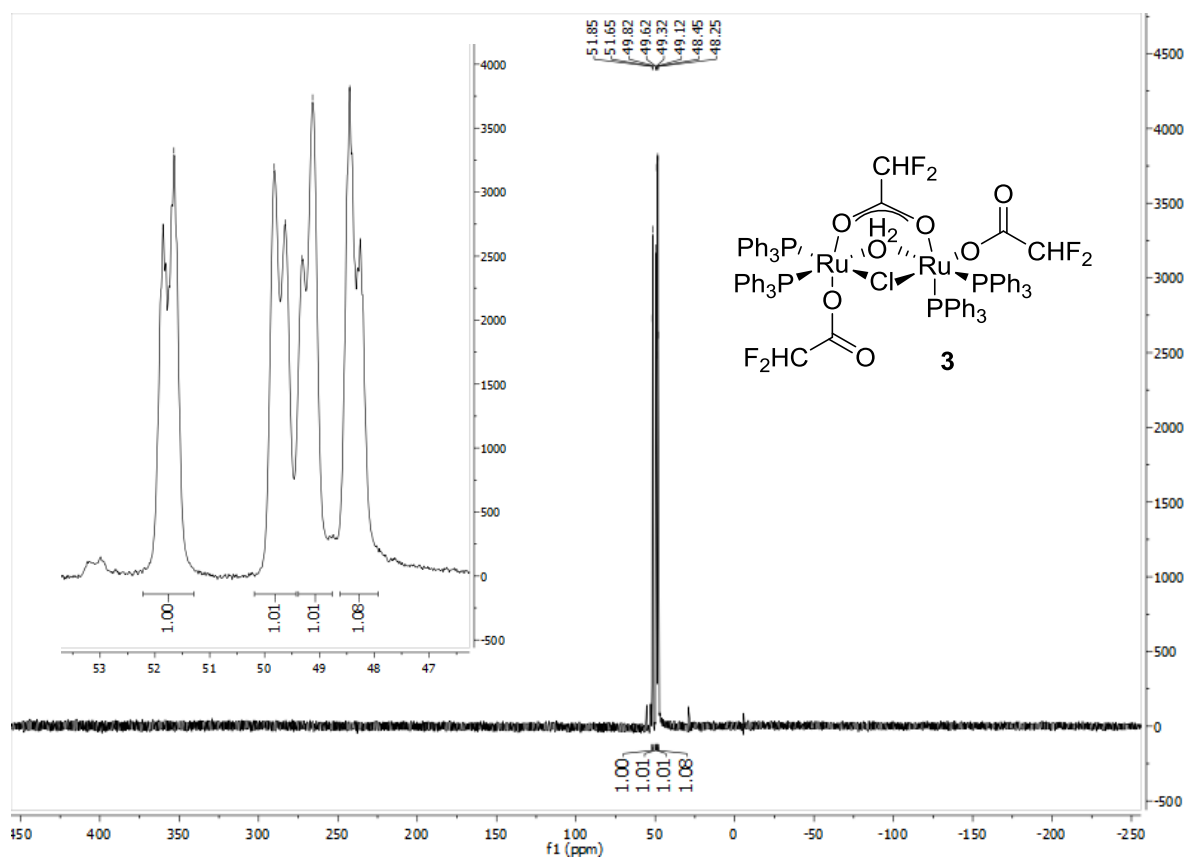

Figure S2.3.1.  $^{31}\text{P}\{^1\text{H}\}$  NMR spectrum of **3** in  $\text{CDCl}_3$ .

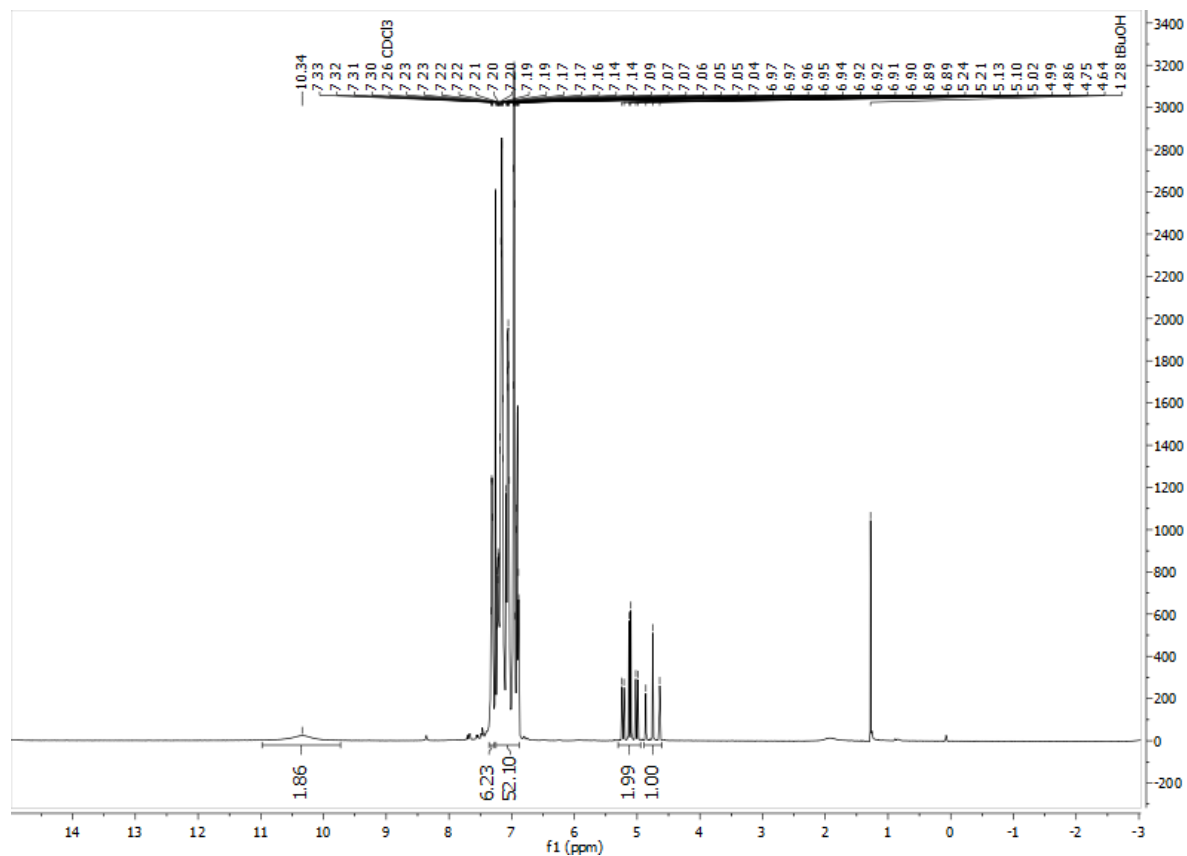

Figure S2.3.2.  $^1\text{H}$  NMR spectrum of **3** in  $\text{CDCl}_3$ .



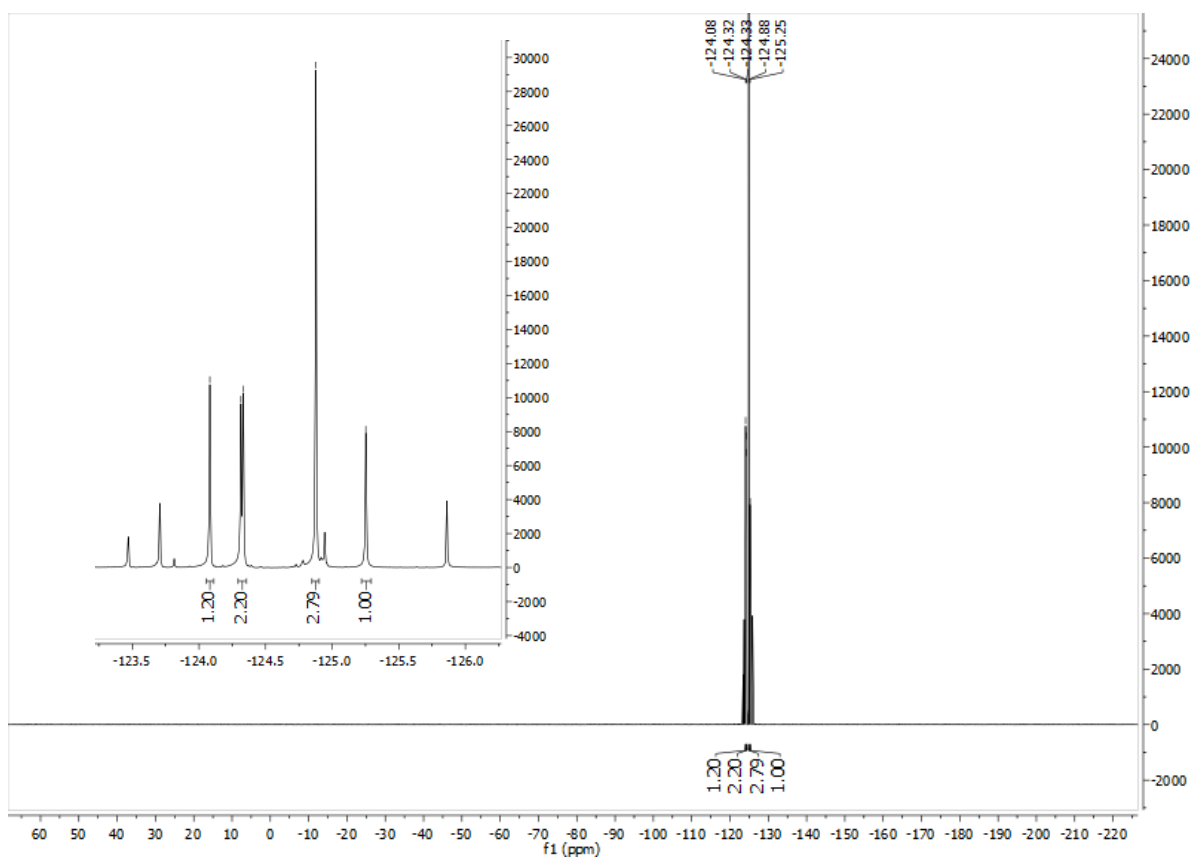

Figure S2.3.3.  $^{19}\text{F}\{^1\text{H}\}$  NMR spectrum of **3** in  $\text{CDCl}_3$ .

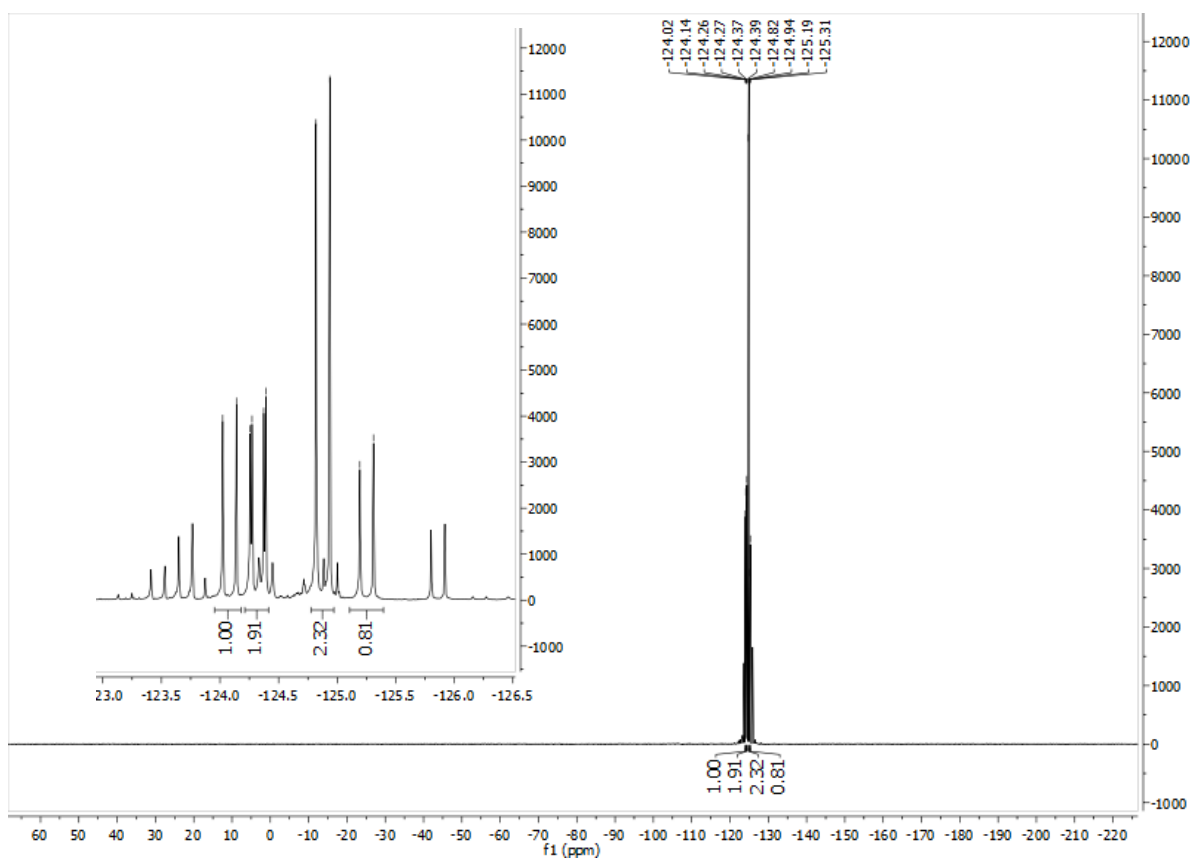

Figure S2.3.4.  $^{19}\text{F}$  NMR spectrum of **3** in  $\text{CDCl}_3$ .

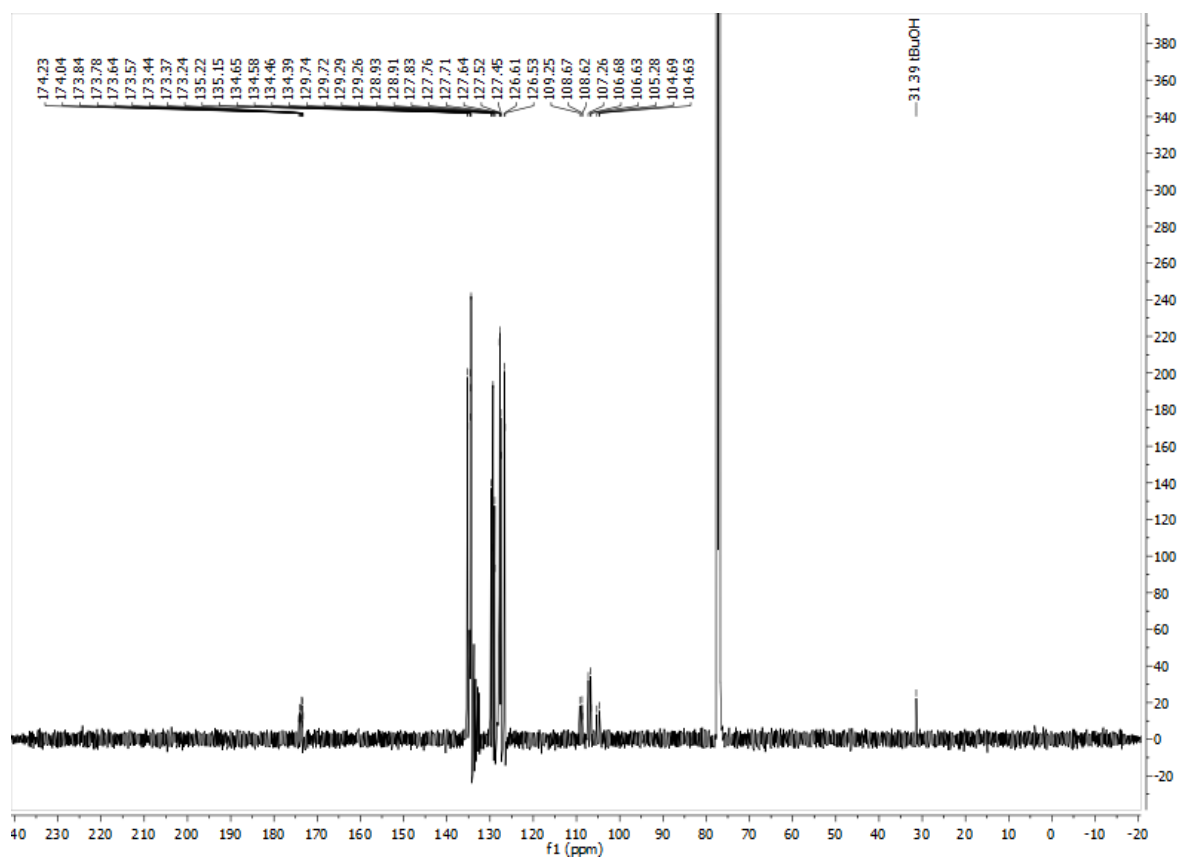

Figure S2.3.5.  $^{13}\text{C}\{^1\text{H}\}$  NMR spectrum of **3** in  $\text{CDCl}_3$ .

## 2.4 NMR spectra of complex 4.

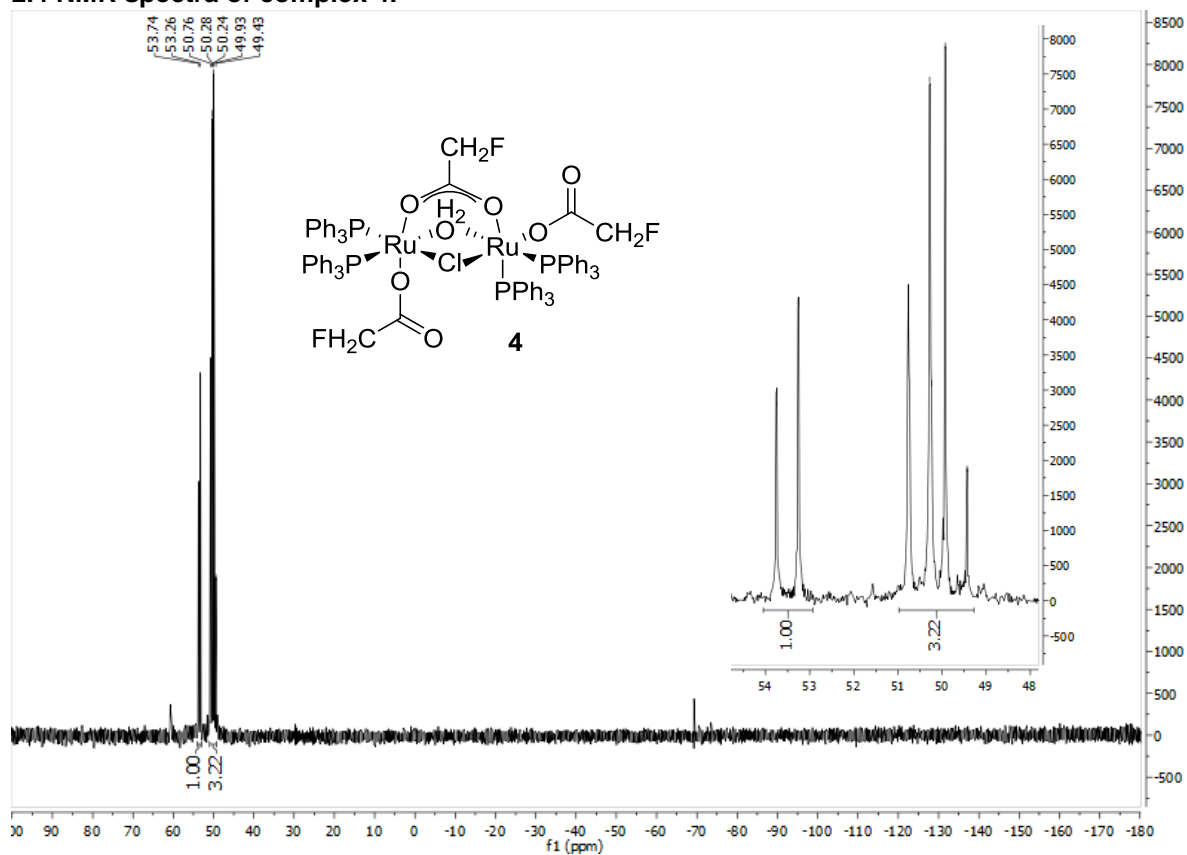

Figure S2.4.1.  $^{31}\text{P}\{^1\text{H}\}$  NMR spectrum of **4** in  $\text{CDCl}_3$ .

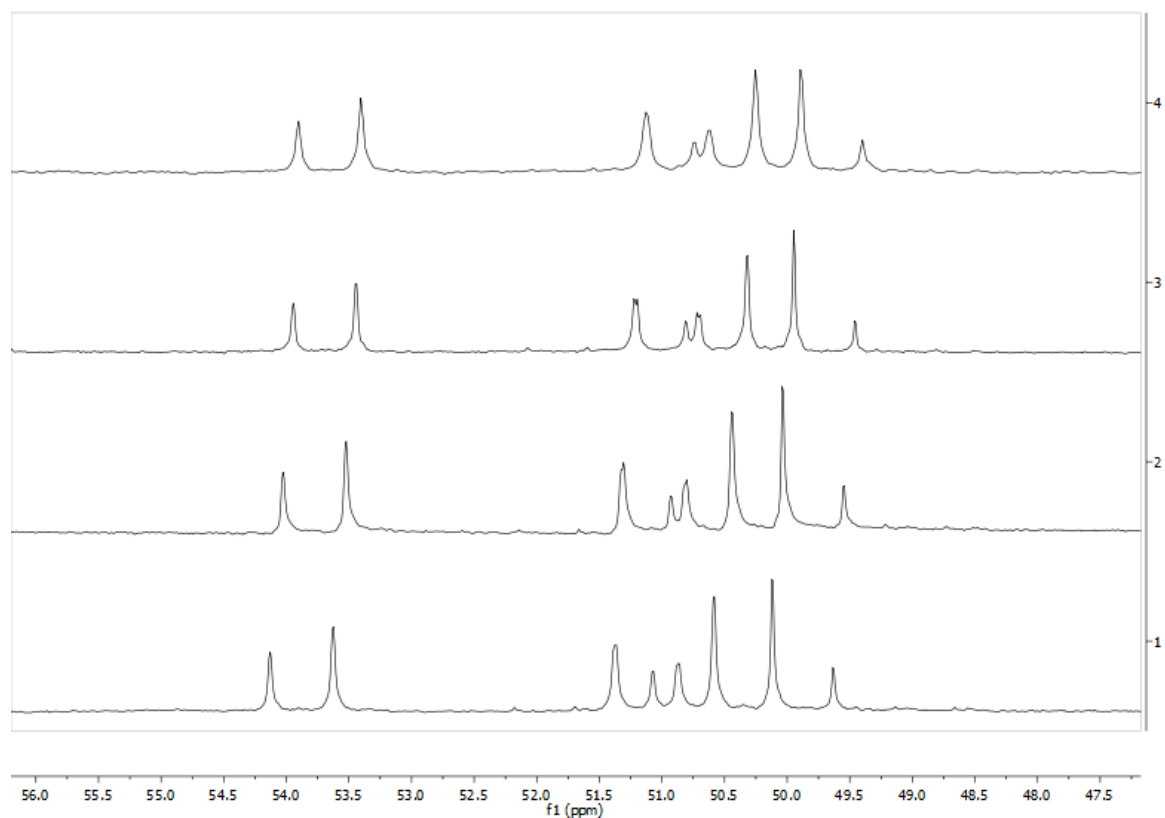

Figure S2.4.2.  $^{31}\text{P}\{^1\text{H}\}$  VT-NMR spectra of **4** in  $\text{CD}_2\text{Cl}_2$ . (1)  $T = -40^\circ\text{C}$ ; (2)  $T = -20^\circ\text{C}$ ; (3)  $T = 0^\circ\text{C}$ ; (4)  $T = 10^\circ\text{C}$ .

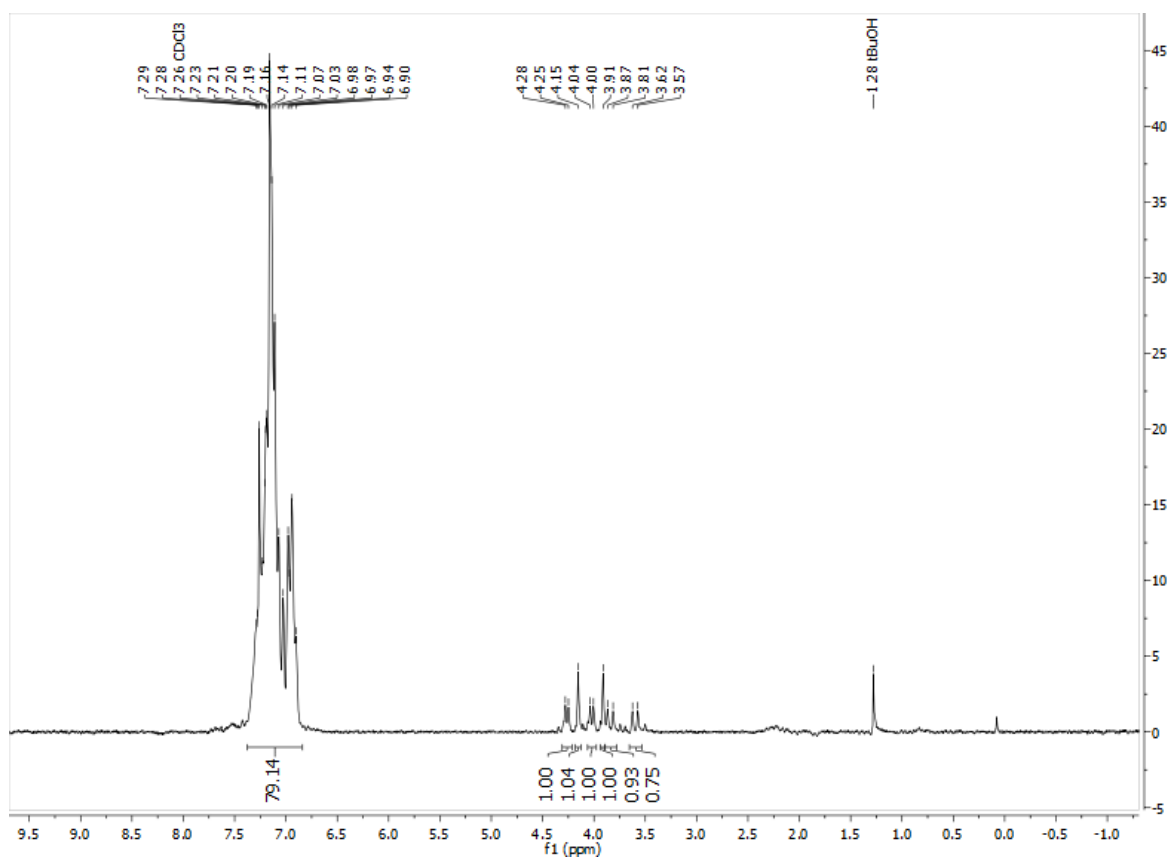

Figure S2.4.3. <sup>1</sup>H NMR spectrum of **4** in CDCl<sub>3</sub>.

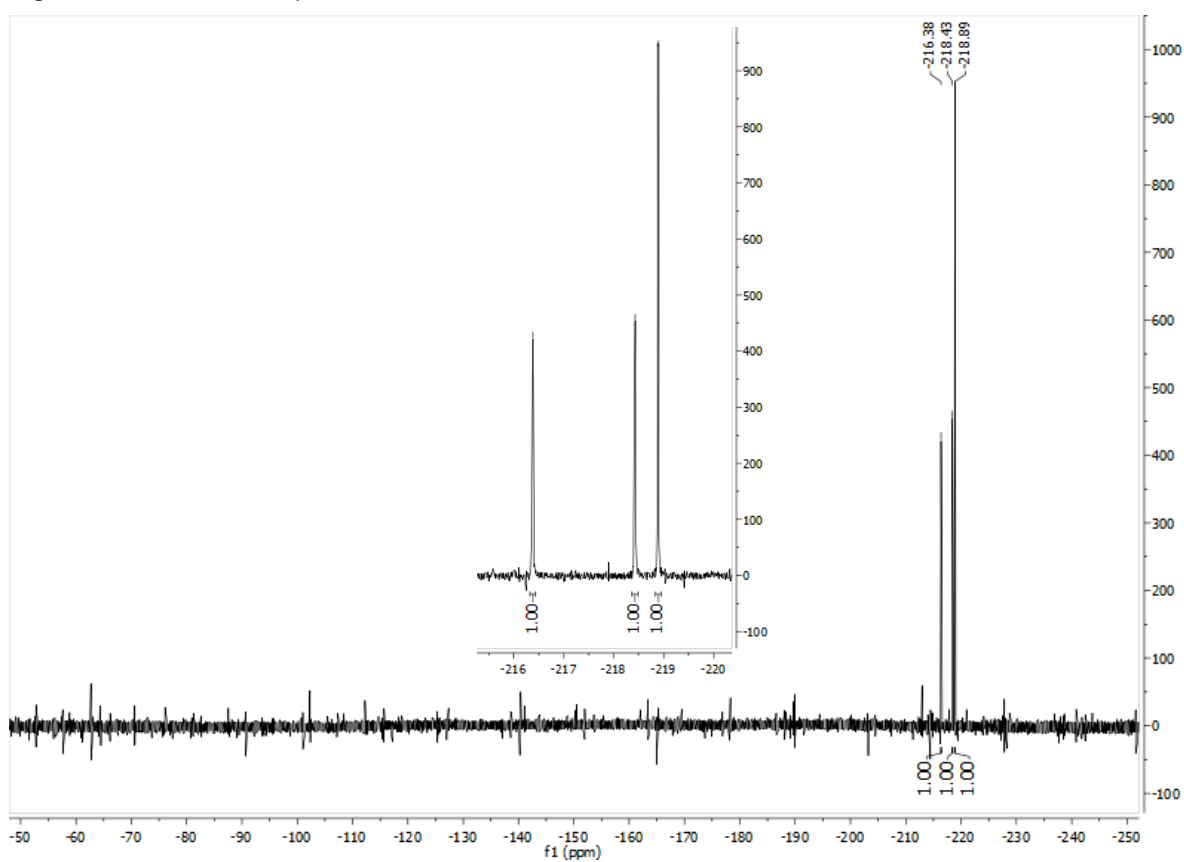

Figure S2.4.4. <sup>19</sup>F{<sup>1</sup>H} NMR spectrum of **4** in CD<sub>2</sub>Cl<sub>2</sub>.

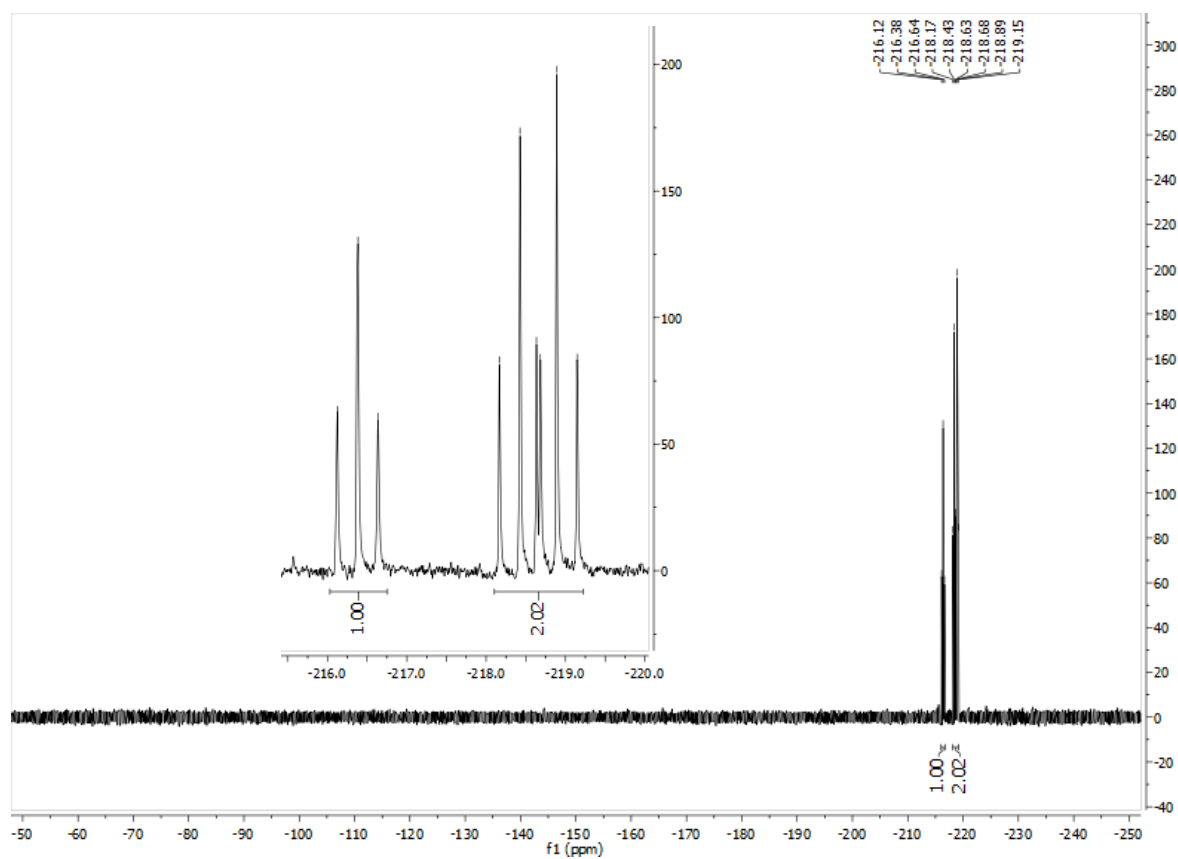

Figure S2.4.5.  $^{19}\text{F}$  NMR spectrum of **4** in  $\text{CD}_2\text{Cl}_2$ .

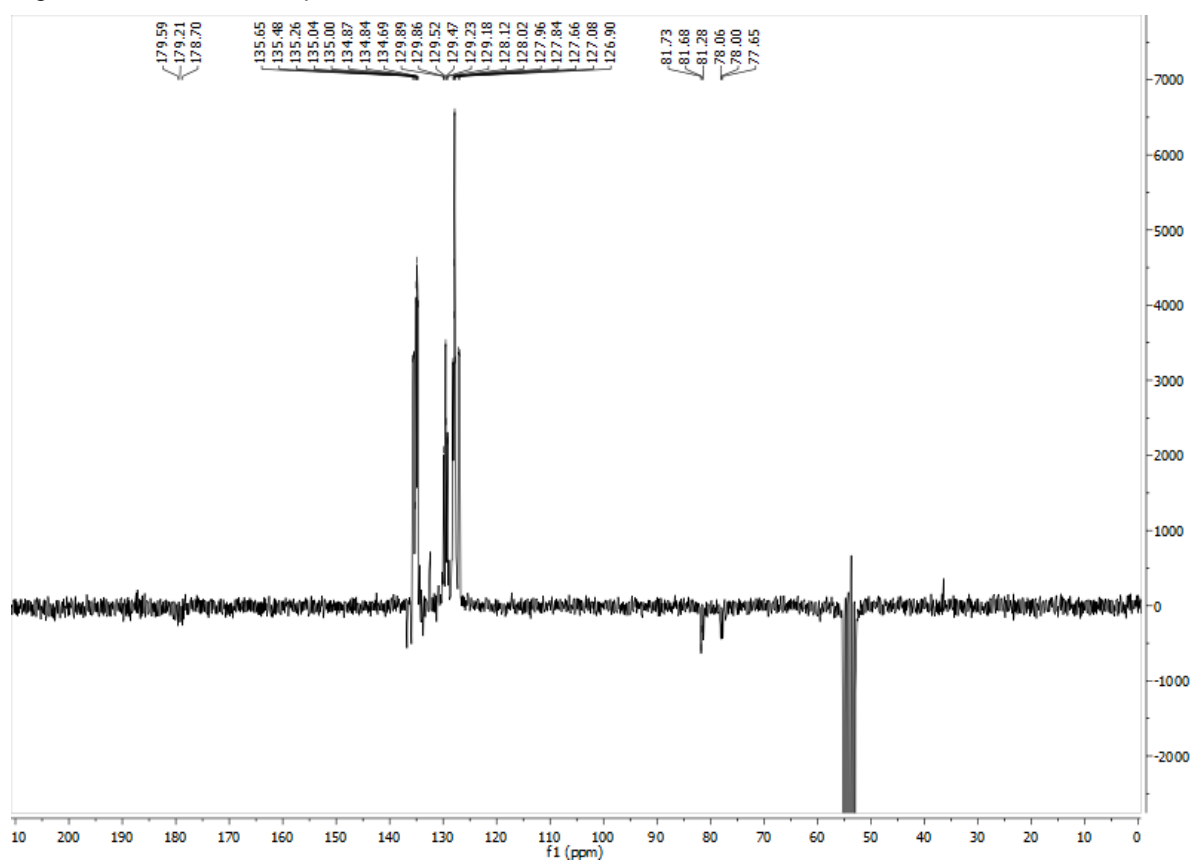

Figure S2.4.6.  $^{13}\text{C}\{^1\text{H}\}$  DEPT NMR spectrum of **4** in  $\text{CDCl}_3$ .

## 2.5 NMR spectra of complex 7.

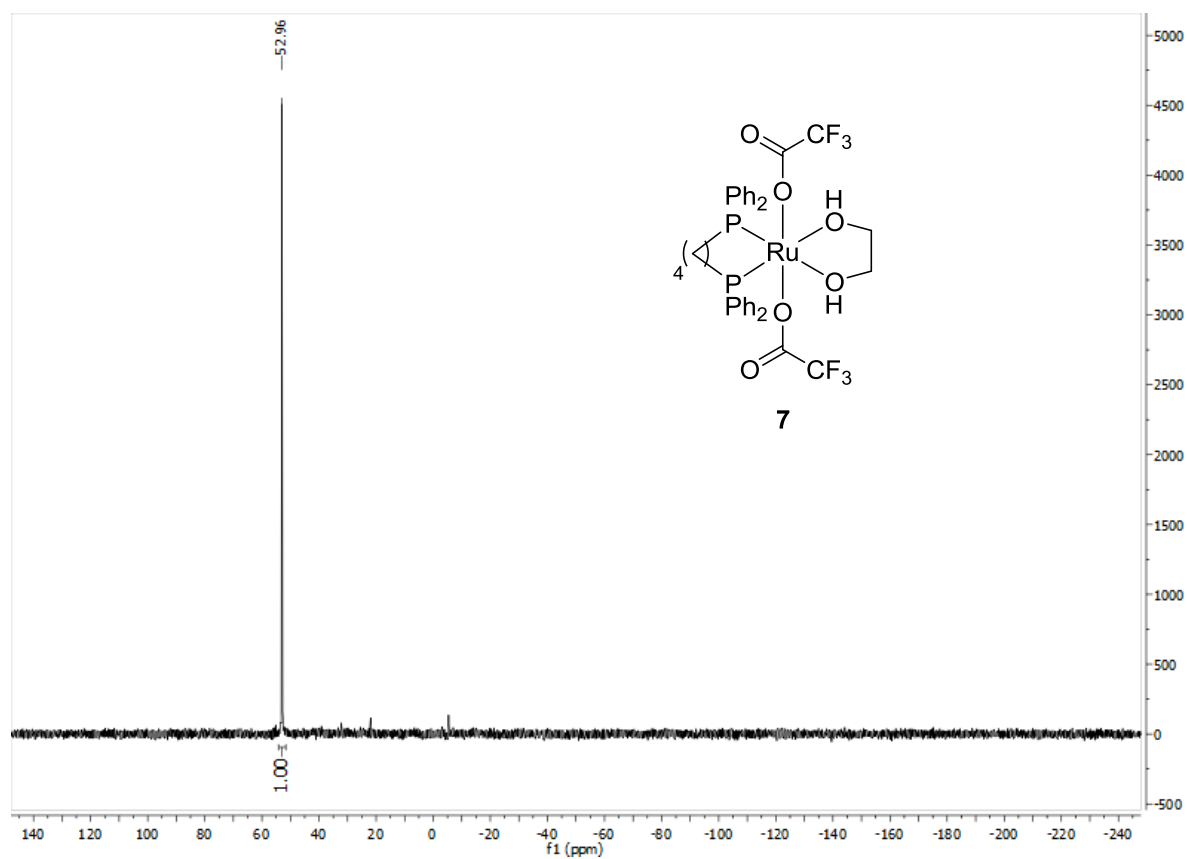

Figure S2.5.1.  $^{31}\text{P}\{^1\text{H}\}$  NMR spectrum of **7** in  $\text{CDCl}_3$ .

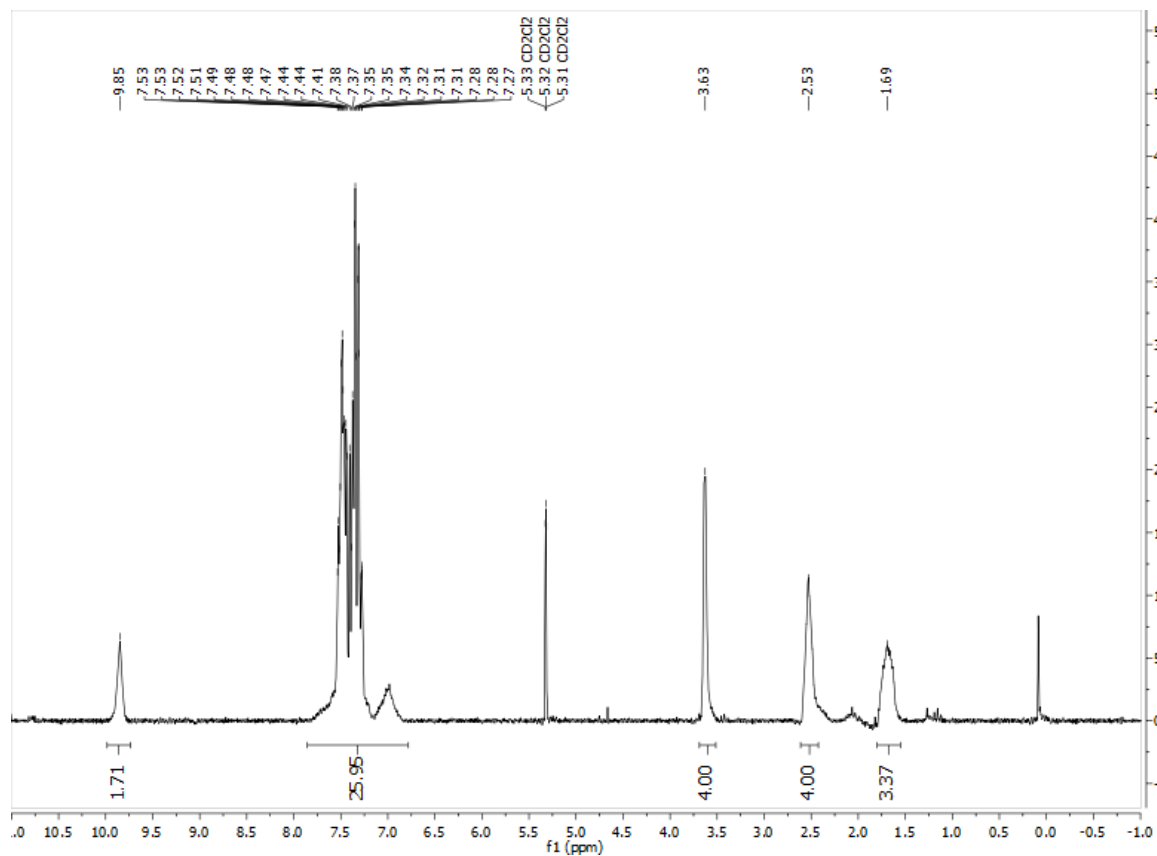

Figure S2.5.2.  $^1\text{H}$  NMR spectrum of **7** in  $\text{CD}_2\text{Cl}_2$ .

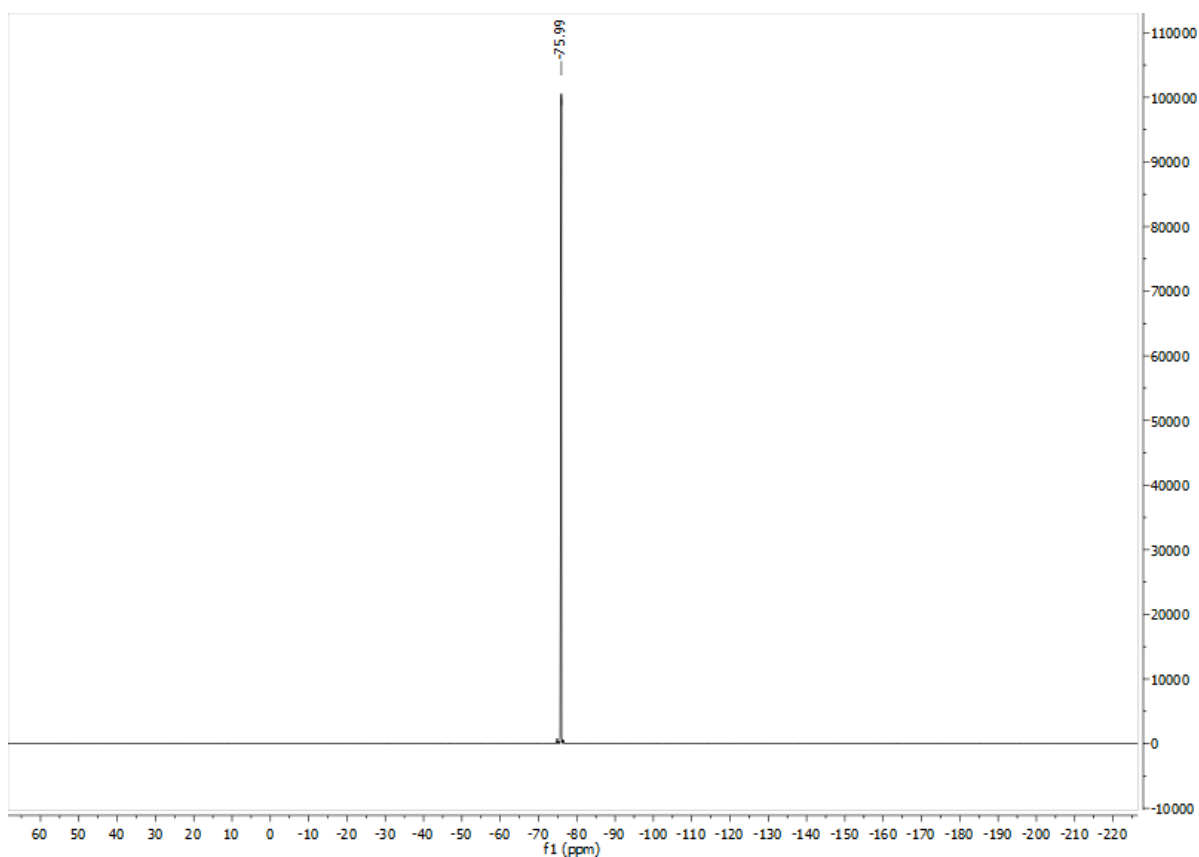

Figure S2.5.3.  $^{19}\text{F}\{^1\text{H}\}$  NMR spectrum of **7** in  $\text{CD}_2\text{Cl}_2$ .

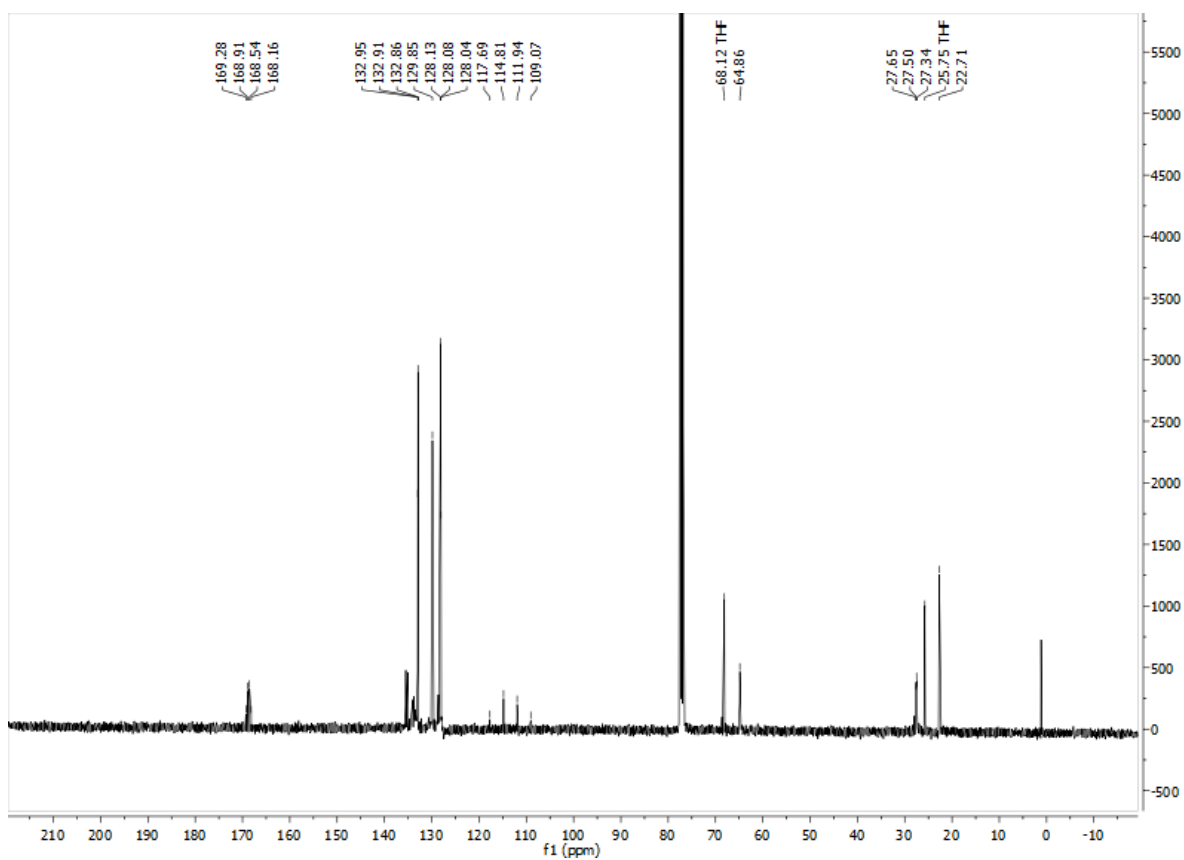

Figure S2.5.4.  $^{13}\text{C}\{^1\text{H}\}$  NMR spectrum of **7** in  $\text{CDCl}_3$ .

## 2.6 NMR spectra of complex **8**.

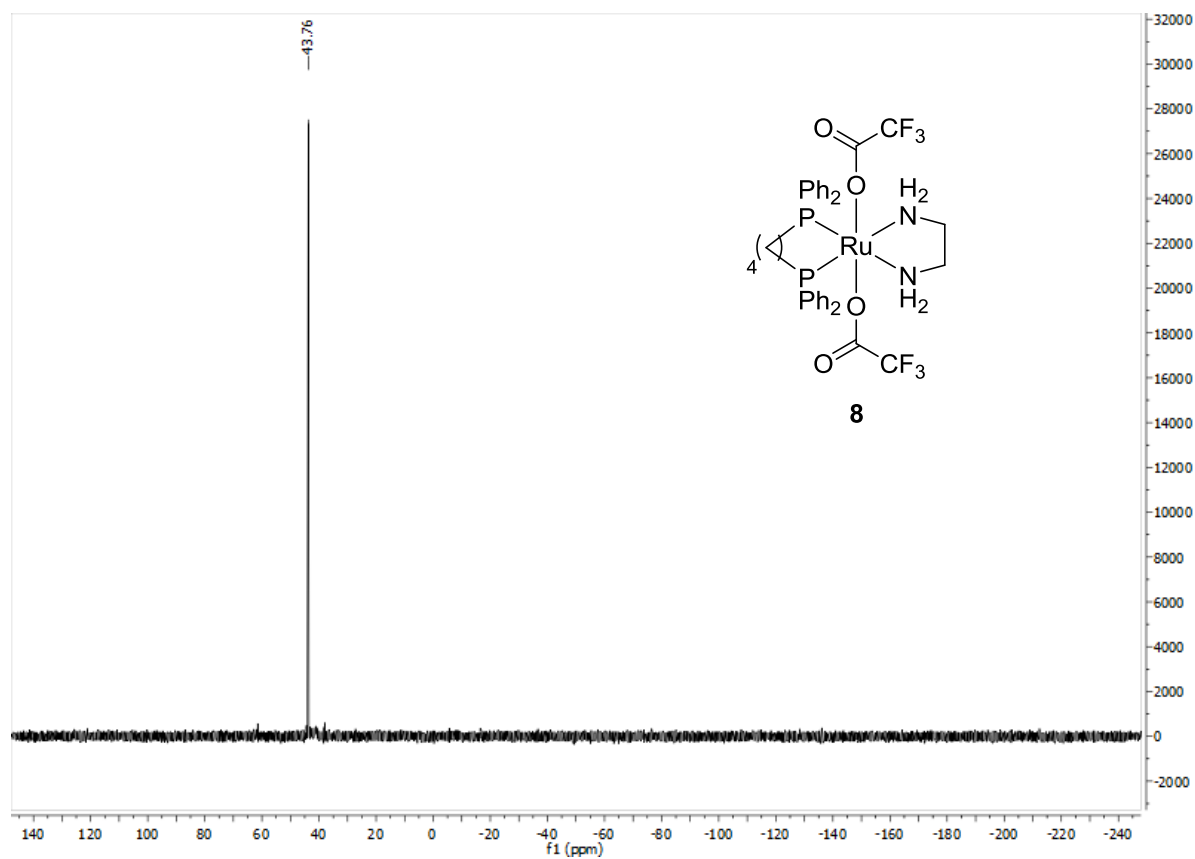

Figure S2.6.1. <sup>31</sup>P{<sup>1</sup>H} NMR spectrum of **8** in CD<sub>2</sub>Cl<sub>2</sub>.

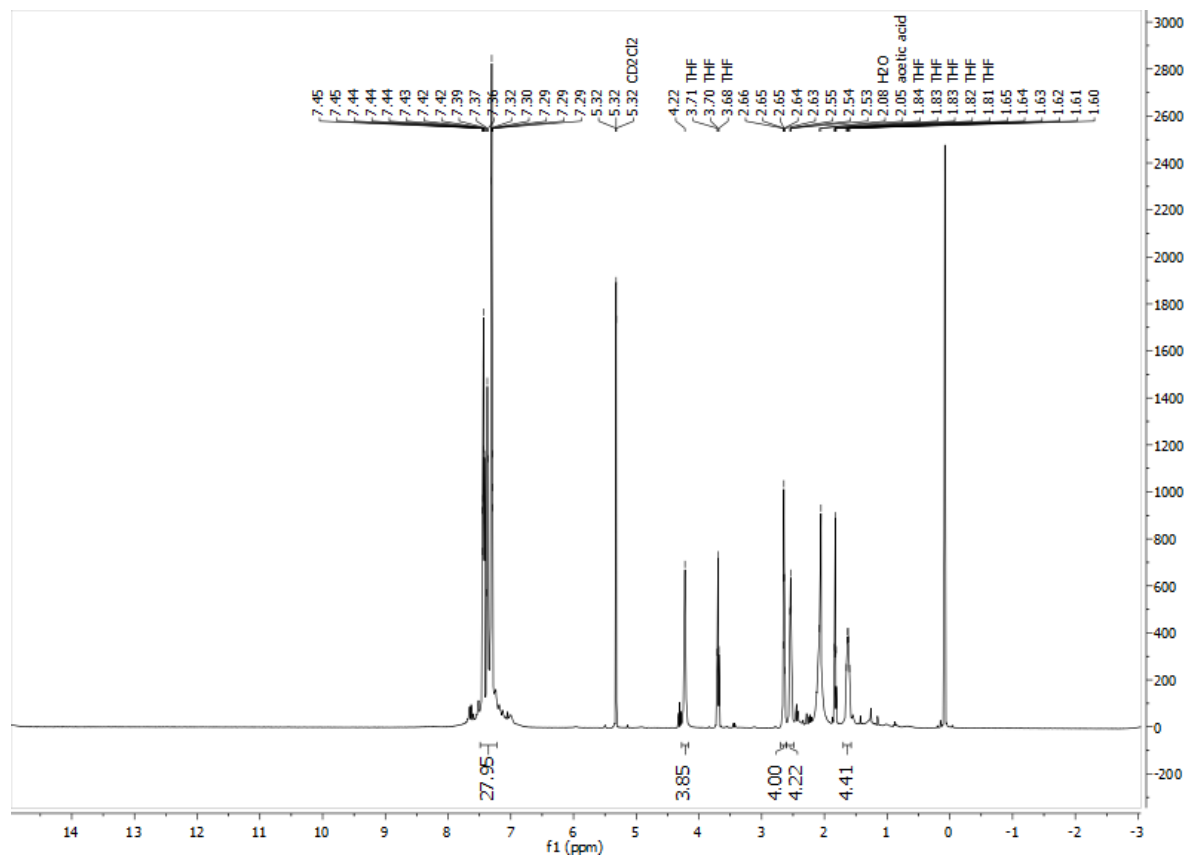

Figure S2.6.2. <sup>1</sup>H NMR spectrum of **8** in CD<sub>2</sub>Cl<sub>2</sub>.



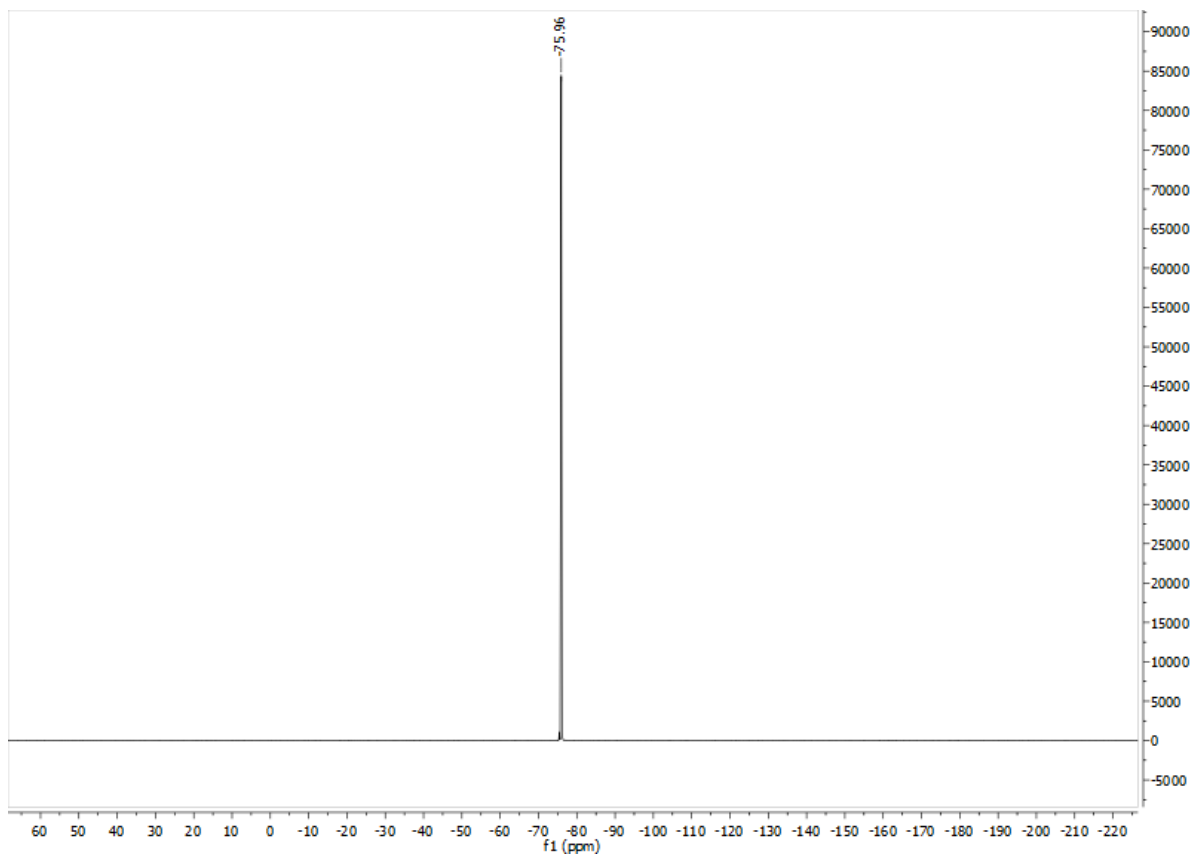

Figure S2.6.3.  $^{19}\text{F}\{^1\text{H}\}$  NMR spectrum of **8** in  $\text{CD}_2\text{Cl}_2$ .

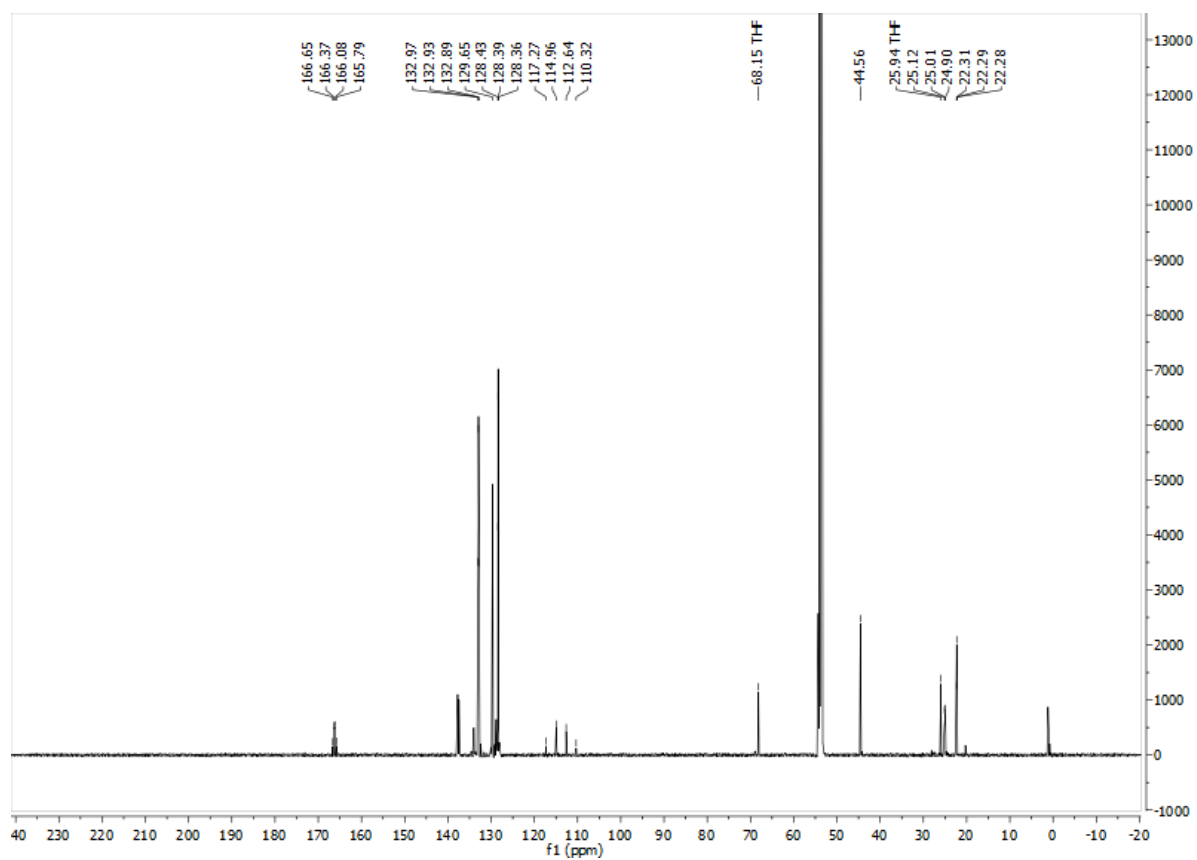

Figure S2.6.4.  $^{13}\text{C}\{^1\text{H}\}$  NMR spectrum of **8** in  $\text{CD}_2\text{Cl}_2$ .

### 3. Catalytic transfer hydrogenation of ketones

#### 3.1 Transfer hydrogenation of acetophenone

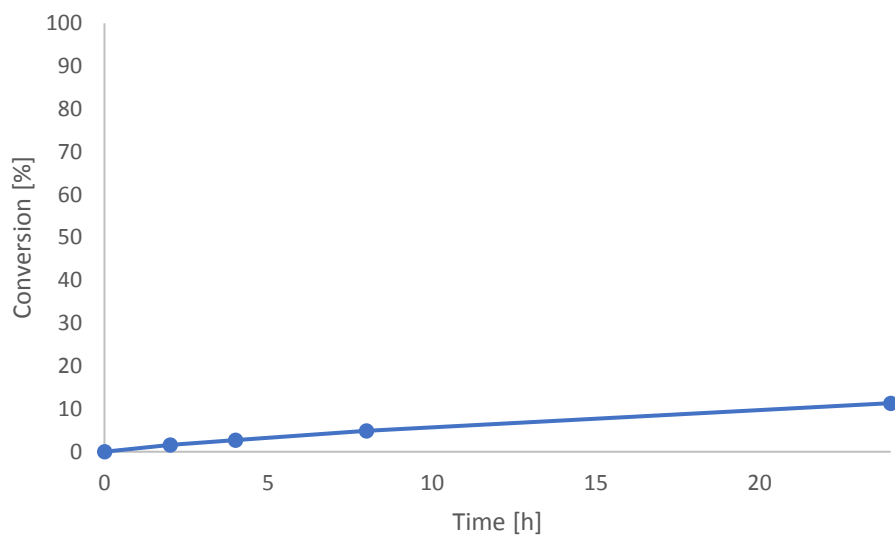

Figure S3.1.1. Transfer hydrogenation of acetophenone in *i*PrOH with 2 mol% NaO*i*Pr without catalyst.

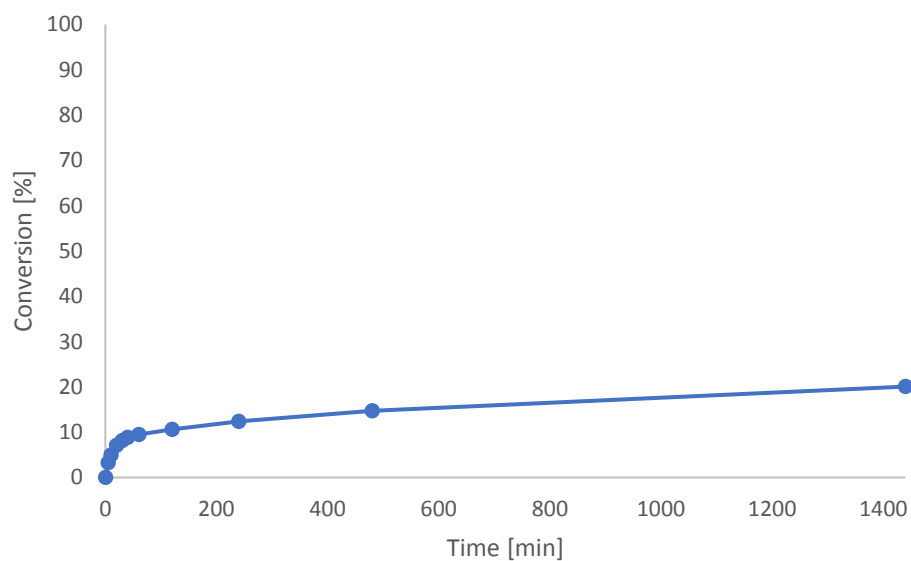

Figure S3.1.2. Transfer hydrogenation of acetophenone in *i*PrOH with 2 mol% NaO*i*Pr and 0.1 mol% **1**.

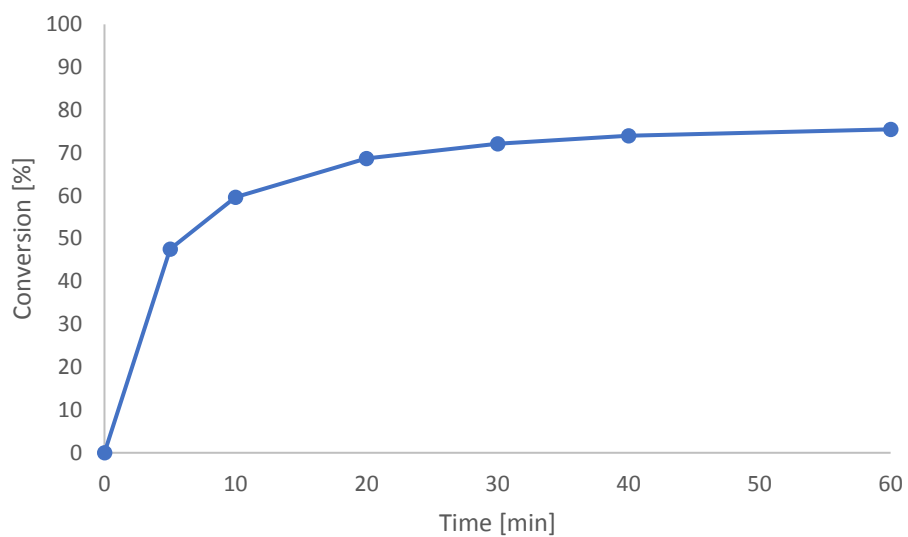

Figure S3.1.3. Transfer hydrogenation of acetophenone in *i*PrOH with 2 mol% NaO*i*Pr and 0.1 mol% **7**.

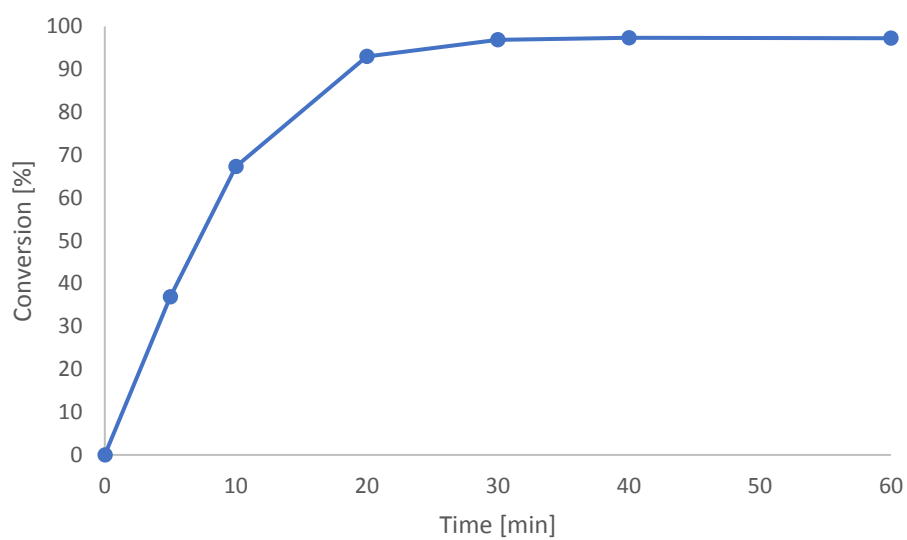

Figure S3.1.4. Transfer hydrogenation of acetophenone in *i*PrOH with 2 mol% NaO*i*Pr and 0.1 mol% **8**.

### 3.2 Transfer hydrogenation of benzophenone

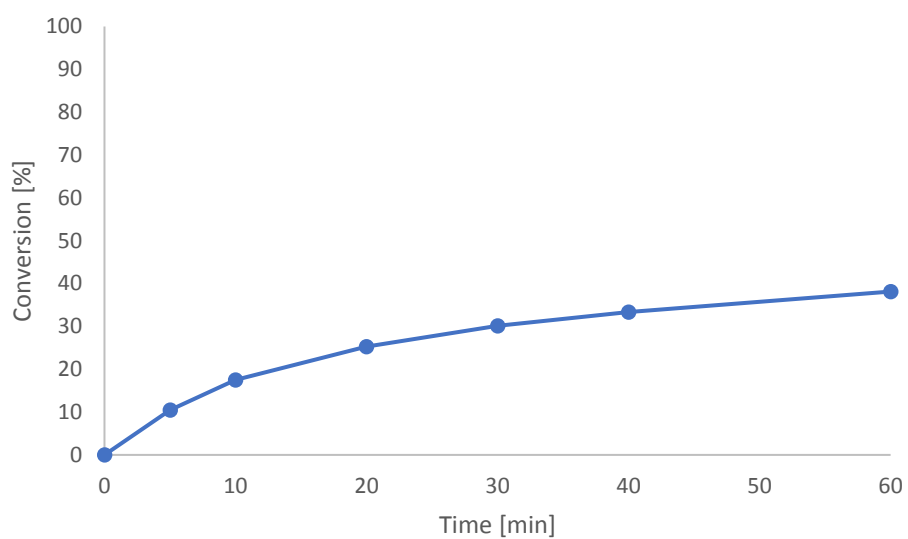

Figure S3.2.1. Transfer hydrogenation of benzophenone in *i*-PrOH with 2 mol% NaO<sup>t</sup>Pr and 0.1 mol% **7**.

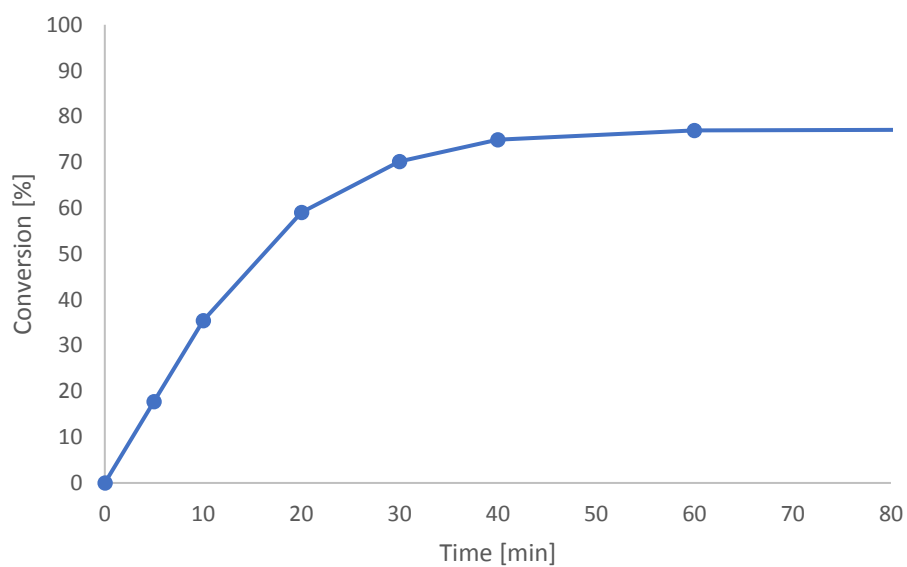

Figure S3.2.2. Transfer hydrogenation of benzophenone in *i*-PrOH with 2 mol% NaO<sup>t</sup>Pr and 0.1 mol% **8**.

### 3.3 Transfer hydrogenation of cyclohexanone

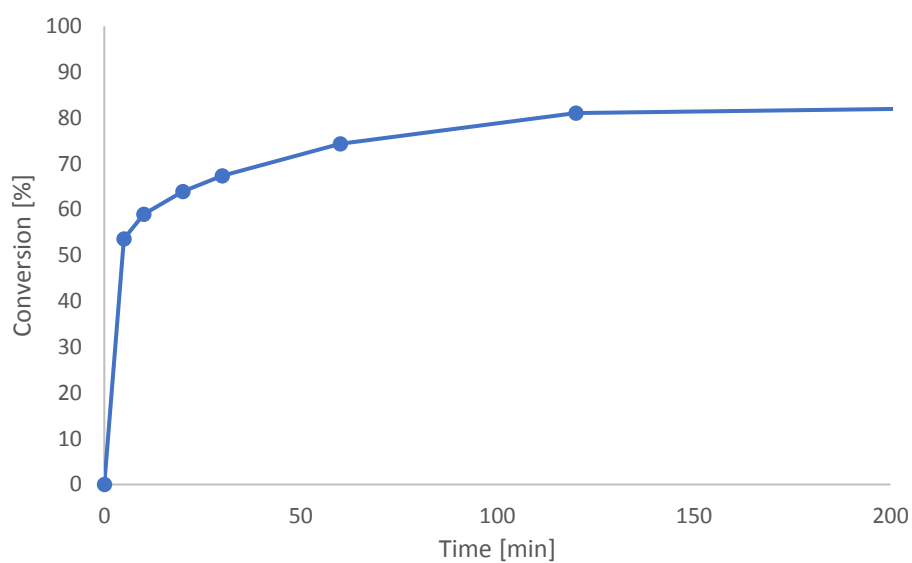

Figure S3.3.1. Transfer hydrogenation of cyclohexanone in *i*PrOH with 2 mol% NaO*i*Pr and 0.03 mol% **7**.

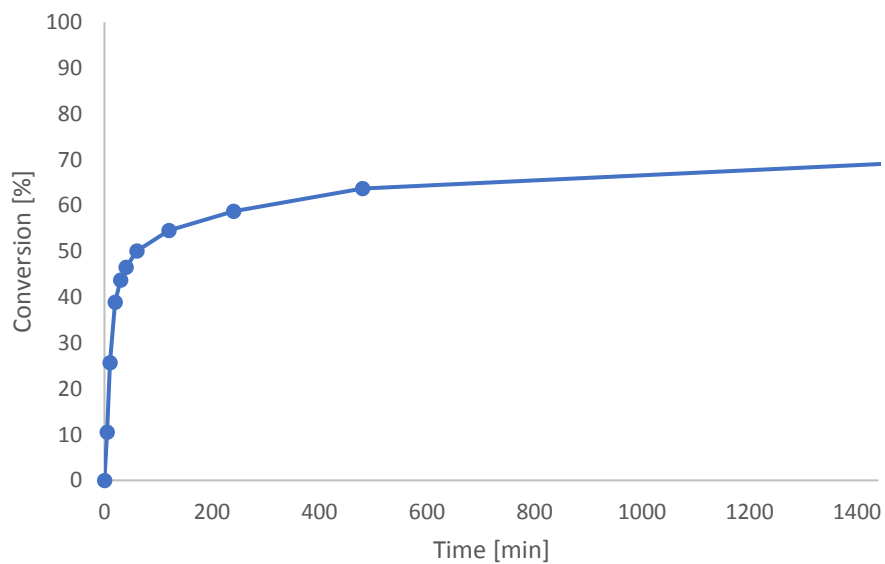

Figure S3.3.2. Transfer hydrogenation of cyclohexanone in *i*PrOH with 2 mol% NaO*i*Pr and 0.03 mol% **8**.
